# Supplementary material for: Microwave irradiated C6-functionalization of 6-chloropurine nucleosides with various mild nucleophiles under solvent-free conditions
Source: Royal Society of Chemistry journal article supplement (doi:10.1039/c0gc00517g), 2010-01-01

## The Supporting Information

### Microwave Irradiation C6-Functionalization of 6-Chloropurine Nucleosides with Various Mild Nucleophiles under Solvent-Free Condition

Hai-Ming Guo,<sup>\*a</sup> Peng-Yang Xin,<sup>a</sup> Hong-Ying Niu,<sup>b</sup> Dong-Chao Wang,<sup>a</sup> Yi Jiang,<sup>a</sup> and Gui-Rong Qu<sup>\*a</sup>

<sup>a</sup> College of Chemistry and Environmental Science, Key Laboratory of Green Chemical Media and Reactions of Ministry of Education, Henan Normal University, Xinxiang, 453007, China. Fax: +86-3733329276; E-mail: guohm518@hotmail.com; quguir@sina.com

<sup>b</sup> School of Chemistry and Chemical Engineering, Henan Institute of Science and Technology, Xinxiang 453003, China

|                                                               |     |
|---------------------------------------------------------------|-----|
| General.....                                                  | S1  |
| Typical experimental procedure.....                           | S2  |
| Characterization of compounds.....                            | S3  |
| Copies of <sup>1</sup> H and <sup>13</sup> C NMR spectra..... | S11 |

**General:** Melting points were recorded with a micro melting point apparatus and uncorrected. NMR spectra were recorded with a 400 NMR spectrometer for <sup>1</sup>H-NMR, 100 MHz for <sup>13</sup>C-NMR. Proton chemical shifts  $\delta$  were given in ppm relative to tetramethylsilane (0.00 ppm) in CDCl<sub>3</sub> or to the residual proton signals of the deuterated solvent DMSO-d<sub>6</sub> (2.50 ppm) for <sup>1</sup>H and <sup>13</sup>C NMR. High resolution mass spectra were taken with a 3000 mass spectrometer, using Waters Q-ToFMS/MS system. For column chromatography 200-300 mesh silica gel (GF254) was used as the stationary phase. All reactions were monitored by thin layer chromatography (TLC). All reagents were purchased from commercial sources and purified commonly before used.

All microwave irradiation experiments were carried out in the cavity of a commercially available single-mode microwave synthesis apparatus equipped with a highly sensitive infrared sensor for temperature control and measurement (MAS-I, Sineo Microwave Chemical Technology Co. Ltd., Shanghai, P. R. of China) with continuous irradiation power from 0 to 600 W. The reactions were carried out in open ceramic mortars. The temperature was measured with an IR sensor on the outer surface of the reaction mortars.

**Typical Experimental Procedure for the Reaction of 6-Halopurine Nucleosides and various Nucleophiles under Microwave Irradiation without Solvent.**

6-Chloropurine **1a** (1 mmol) and phenol (1.5 mmol), K<sub>2</sub>CO<sub>3</sub> (2 mmol) were put in a ceramic mortar and then sufficient rubbing was needed to make the reactant well-distributed. Then the mixture was put into the cavity of the microwave synthesis apparatus and irradiated at 400 W at 90 °C for 5 min. After completion of the reaction, the mortar was cooled to room temperature, followed by TLC examination, the colored material was dissolved in ethyl acetate and adsorbed on silica gel and purified by silica gel column chromatography to give **3a** using CH<sub>2</sub>Cl<sub>2</sub>:CH<sub>3</sub>OH = 30:1 (v/v) as the eluent.

## Characterization of compounds

### 6-phenoxy-9H-purine (3a)

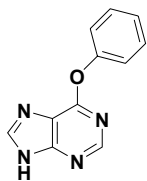

White powder, mp 197-200 °C. <sup>1</sup>H NMR (DMSO-d<sub>6</sub>, 400 MHz) δ 13.55 (s, 1H), 8.46 (s, 1H), 8.40 (s, 1H), 7.48-7.29 (m, 5H). <sup>13</sup>C NMR (DMSO-d<sub>6</sub>, 100 MHz) δ 152.7, 151.6, 130.1, 125.9, 122.4 .  
HRMS: calcd for C<sub>11</sub>H<sub>9</sub>N<sub>4</sub>O [M + H<sup>+</sup>] 213.0776, found 213.0779.

### 9-methyl-6-phenoxy-9H-purine (3b)

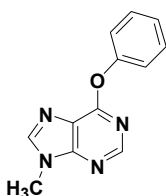

White powder, mp 150-152 °C. <sup>1</sup>H NMR (CDCl<sub>3</sub>, 400 MHz) δ 8.52 (s, 1H), 8.00 (s, 1H), 7.48-7.27 (m, 5H), 3.92 (s, 3H). <sup>13</sup>C NMR (CDCl<sub>3</sub>, 100 MHz) δ 160.2, 153.4, 152.4, 152.1, 143.6, 129.6, 125.7, 121.8, 121.5, 30.1. HRMS: calcd for C<sub>12</sub>H<sub>10</sub>N<sub>4</sub>NaO [M + Na<sup>+</sup>] 249.0752, found 249.0754.

### 9-allyl-6-phenoxy-9H-purine (3c)

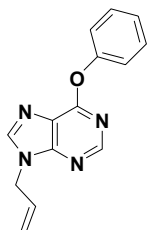

White powder, mp 89-91 °C. <sup>1</sup>H NMR (CDCl<sub>3</sub>, 400 MHz) δ 8.51 (s, 1H), 8.03 (s, 1H), 7.47-7.30 (m, 5H), 6.11-6.02 (m, 1H), 5.35 (d, J = 10.4 Hz, 1H), 5.24(d, J = 17.2 Hz, 2H), 4.90 (d, J = 5.6Hz, 2H). <sup>13</sup>C NMR (CDCl<sub>3</sub>, 100 MHz) δ 160.3, 152.9, 152.4, 152.1, 142.9, 131.4, 129.6, 125.8, 121.8, 121.5, 119.3, 46.1. HRMS: calcd for C<sub>14</sub>H<sub>12</sub>N<sub>4</sub>NaO [M + Na<sup>+</sup>] 275.0909, found 275.0918.

### 9-benzyl-6-phenoxy-9H-purine (3d)

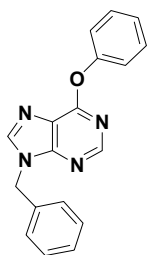

White powder, mp 111-113 °C.  $^1\text{H}$  NMR ( $\text{CDCl}_3$ , 400 MHz)  $\delta$  8.55 (s, 1H), 8.01(s, 1H), 7.48-7.27 (m, 10H), 5.45 (s, 2H).  $^{13}\text{C}$  NMR ( $\text{CDCl}_3$ , 100 MHz)  $\delta$  160.3, 153.2, 152.4, 152.3, 142.9, 135.1, 129.6, 129.1, 128.6, 127.9, 125.8, 121.8, 121.5, 47.6. HRMS: calcd for  $\text{C}_{18}\text{H}_{15}\text{N}_4\text{O}$  [ $\text{M} + \text{H}^+$ ] 303.1246, found 303.1239.

### 9-(2-chlorobenzyl)-6-phenoxy-9H-purine (3e)

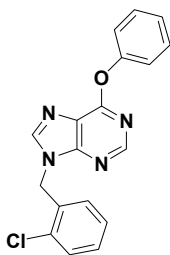

White powder, mp 120-121 °C.  $^1\text{H}$  NMR ( $\text{CDCl}_3$ , 400 MHz)  $\delta$  8.54 (s, 1H), 8.09 (s, 1H), 7.48-7.23 (m, 9H), 5.57 (s, 2H).  $^{13}\text{C}$  NMR ( $\text{CDCl}_3$ , 100 MHz)  $\delta$  160.3, 153.2, 152.4, 152.3, 143.2, 133.5, 132.7, 130.3, 130.1, 130.0, 129.6, 127.5, 125.8, 121.8, 121.4, 45.2. HRMS: calcd for  $\text{C}_{18}\text{H}_{14}\text{ClN}_4\text{O}$  [ $\text{M} + \text{H}^+$ ] 337.0856, found 337.0847.

### 6-phenoxy-9-(beta-D-ribofuranosyl) purine (3f)

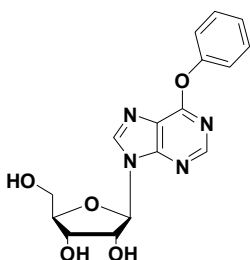

Yellow oily liquid.  $^1\text{H}$  NMR ( $\text{DMSO-d}_6$ , 400 MHz)  $\delta$  8.77 (s, 1H), 8.48 (s, 1H), 7.50-7.28 (m, 5H), 6.04 (d,  $J = 5.6$  Hz, 1H), 5.56 (d,  $J = 6$  Hz, 1H), 5.27 (d,  $J = 5.2$  Hz, 1H), 5.15(t,  $J = 5.6$  Hz, 1H), 4.62 (q,  $J = 8.4$  Hz, 1H), 4.19 (q,  $J = 6.4$  Hz, 1H), 3.99 (d,  $J = 3.6$  Hz, 1H), 3.73-3.55 (m, 2H).  $^{13}\text{C}$  NMR ( $\text{DMSO-d}_6$ , 100 MHz)  $\delta$  159.4, 152.7, 152.1, 151.4, 143.3, 129.6, 125.5, 121.8, 118.7, 115.1,

87.8, 85.6, 73.7, 70.2, 61.2. HRMS: calcd for  $C_{16}H_{16}N_4NaO_5$  [ $M + Na^+$ ] 367.1018, found 367.1009.

**2-chloro-6-phenoxy-9H-purine (3g)**

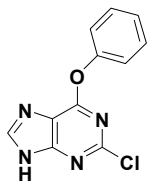

White powder, mp 212-215 °C.  $^1H$  NMR (DMSO- $d_6$ , 400 MHz)  $\delta$  13.55 (s, 1H), 8.46 (s, 1H), 8.40 (s, 1H), 7.48-7.29 (m, 5H).  $^{13}C$  NMR (DMSO- $d_6$ , 100 MHz)  $\delta$  152.3, 151.1, 130.3, 126.4, 122.1. HRMS: calcd for  $C_{11}H_8ClN_4O$  [ $M + H^+$ ] 247.0387, found 247.0393.

**9-allyl-2-chloro-6-phenoxy-9H-purine (3h)**

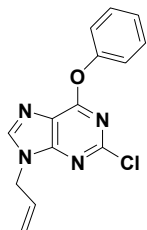

White powder, mp 99-101 °C.  $^1H$  NMR ( $CDCl_3$ , 400 MHz)  $\delta$  7.87 (s, 1H), 7.46-7.27 (m, 5H), 6.09-5.99 (m, 1H), 5.36 (d,  $J = 10$  Hz, 1H), 5.31 (d,  $J = 18.8$  Hz, 1H), 4.85 (d,  $J = 6$  Hz, 2H).  $^{13}C$  NMR ( $CDCl_3$ , 100 MHz)  $\delta$  160.1, 154.1, 153.0, 152.1, 143.2, 131.1, 129.5, 125.9, 121.5, 120.5, 119.8, 46.1. HRMS: calcd for  $C_{14}H_{12}ClN_4O$  [ $M + H^+$ ] 287.0700, found 287.0699.

**9-benzyl-2-chloro-6-phenoxy-9H-purine (3i)**

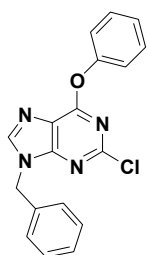

White powder, mp 118-120 °C.  $^1H$  NMR ( $CDCl_3$ , 400 MHz)  $\delta$  7.93 (s, 1H), 7.47-7.28 (m, 10H), 5.41 (s, 2H).  $^{13}C$  NMR ( $CDCl_3$ , 100 MHz)  $\delta$  152.4, 152.3, 142.9, 135.1, 129.6, 129.1, 128.6, 127.8, 125.8, 121.8, 121.5, 47.6. HRMS: calcd for  $C_{18}H_{14}ClN_4O$  [ $M + H^+$ ] 337.0856, found 337.0854.

**9-( $\beta$ -D-triacetoxyribofuranosyl)-2-chloro-6-phenoxy-9H-purine (3j)**

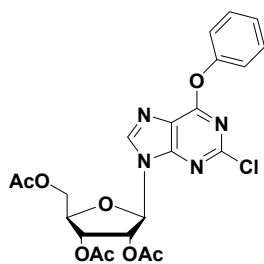

Colorless oil.  $^1\text{H}$  NMR ( $\text{CDCl}_3$ , 400 MHz)  $\delta$  8.19 (s, 1H), 7.44-7.15 (m, 5H), 6.22 (d,  $J=5.2$  Hz, 1H), 5.83 (t,  $J=5.6$  Hz, 1H), 5.60 (t,  $J=5.2$  Hz, 1H), 4.45 (t,  $J=4$  Hz, 1H), 4.40 (t,  $J=4.4$  Hz, 2H), 2.17 (s, 3H), 2.12 (s, 3H), 2.07 (s, 3H).  $^{13}\text{C}$  NMR ( $\text{CDCl}_3$ , 100 MHz)  $\delta$  170.4, 169.7, 169.5, 160.2, 156.3, 153.5, 151.9, 141.7, 129.6, 129.5, 126.1, 121.4, 120.0, 115.4, 86.3, 80.5, 73.3, 70.6, 63.0, 20.8, 20.5, 20.4. HRMS: calcd for  $\text{C}_{22}\text{H}_{21}\text{ClN}_4\text{NaO}_8$  [ $\text{M} + \text{Na}^+$ ] 527.0946, found 527.0921.

**2-amino-6-phenoxy-9-( $\beta$ -D-ribofuranosyl) purine (3k)**

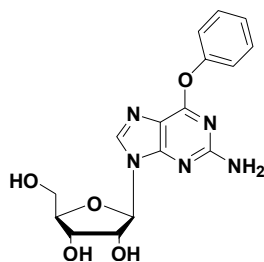

White powder, mp 110-111  $^\circ\text{C}$ .  $^1\text{H}$  NMR ( $\text{DMSO-d}_6$ , 400 MHz)  $\delta$  8.22 (s, 1H), 7.45-7.22 (m, 5H), 6.44 (s, 2H), 5.82 (d,  $J=6$  Hz, 1H), 5.42 (d,  $J=6$  Hz, 1H), 5.15 (d,  $J=4.8$  Hz, 1H), 5.07 (t,  $J=5.6$  Hz, 1H), 4.49 (q,  $J=8.4$  Hz, 1H), 4.12 (q,  $J=6.8$  Hz, 1H), 3.90 (d,  $J=6$  Hz, 1H), 3.67-3.53 (m, 2H).  $^{13}\text{C}$  NMR ( $\text{DMSO-d}_6$ , 100 MHz)  $\delta$  160.2, 155.7, 153.0, 139.4, 130.0, 125.6, 122.1, 114.5, 87.0, 85.7, 74.0, 70.8, 61.8. HRMS: calcd for  $\text{C}_{16}\text{H}_{17}\text{N}_5\text{NaO}_5$  [ $\text{M} + \text{Na}^+$ ] 382.1127, found 382.1115.

**9-allyl-2-chloro-6-(p-tolyloxy)-9H-purine (4a)**

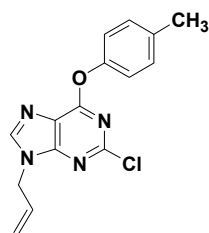

White powder, mp 125-127  $^\circ\text{C}$ .  $^1\text{H}$  NMR ( $\text{CDCl}_3$ , 400 MHz)  $\delta$  7.98 (s, 1H), 7.24-7.10 (m, 4H), 6.08-6.01 (m, 1H), 5.37 (d,  $J=10.4$  Hz, 1H), 5.27 (d,  $J=16.8$  Hz, 1H), 4.86 (d,  $J=5.6$  Hz, 2H),

2.39 (s, 3H).  $^{13}\text{C}$  NMR ( $\text{CDCl}_3$ , 100 MHz)  $\delta$  160.3, 154.0, 153.0, 149.8, 143.2, 135.5, 131.1, 130.0, 121.1, 120.5, 119.7, 46.1, 20.9. HRMS: calcd for  $\text{C}_{15}\text{H}_{13}\text{ClN}_4\text{NaO}$  [ $\text{M} + \text{Na}^+$ ] 323.0676, found 323.0677.

**9-allyl-2-chloro-6-(m-tolyloxy)-9H-purine (4b)**

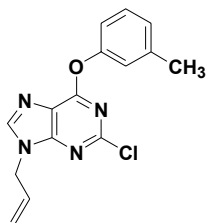

White powder, mp 64-65 °C.  $^1\text{H}$  NMR ( $\text{CDCl}_3$ , 400 MHz)  $\delta$  7.98 (s, 1H), 7.34-7.09 (m, 4H), 6.08-6.01 (m, 1H), 5.37 (d,  $J=10.4$  Hz, 1H), 5.27 (d,  $J=17.2$  Hz, 1H), 4.86 (d,  $J=5.6$  Hz, 2H), 2.40 (s, 3H).  $^{13}\text{C}$  NMR ( $\text{CDCl}_3$ , 100 MHz)  $\delta$  160.2, 154.1, 153.1, 152.1, 143.2, 139.7, 131.1, 129.2, 126.7, 121.9, 120.5, 119.8, 118.4, 46.1, 21.4. HRMS: calcd for  $\text{C}_{15}\text{H}_{13}\text{ClN}_4\text{NaO}$  [ $\text{M} + \text{Na}^+$ ] 323.0676, found 323.0675.

**9-allyl-2-chloro-6-(4-nitrophenoxy)-9H-purine (4c)**

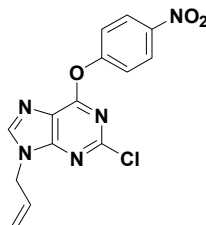

White powder, mp 131-133 °C.  $^1\text{H}$  NMR ( $\text{CDCl}_3$ , 400 MHz)  $\delta$  8.34 (d,  $J=9.2$  Hz, 2H), 8.04 (s, 1H), 7.48 (d,  $J=9.2$  Hz, 2H), 6.10-6.00 (m, 1H), 5.39 (d,  $J=10$  Hz, 1H), 5.29 (d,  $J=16.8$  Hz, 1H), 4.88 (d,  $J=6$  Hz, 2H).  $^{13}\text{C}$  NMR ( $\text{CDCl}_3$ , 100 MHz)  $\delta$  158.8, 156.7, 154.6, 152.7, 145.3, 144.1, 130.8, 125.4, 122.2, 120.4, 120.1, 46.3. HRMS: calcd for  $\text{C}_{14}\text{H}_{11}\text{ClN}_5\text{O}_3$  [ $\text{M} + \text{H}^+$ ] 332.0550, found 332.0553.

**9-allyl-2-chloro-6-(2-nitrophenoxy)-9H-purine (4d)**

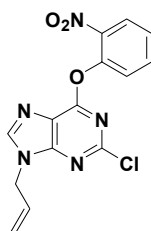

White powder, mp 177-179 °C. <sup>1</sup>H NMR (CDCl<sub>3</sub>, 400 MHz) δ 8.20 (q, J=4.8 Hz, 1H), 8.03 (s, 1H), 7.77-7.73 (m, 1H), 7.52-7.44 (m, 2H), 6.11-6.01 (m, 1H), 5.39 (d, J=10 Hz, 1H), 5.31(d, J=17.2 Hz, 1H), 4.87(d, J=6 Hz, 2H). <sup>13</sup>C NMR (CDCl<sub>3</sub>, 100 MHz) δ 159.1, 154.5, 152.7, 145.1, 143.9, 141.9, 135.1, 130.9, 126.9, 126.1, 125.3, 120.1, 120.1, 46.3. HRMS: calcd for C<sub>14</sub>H<sub>10</sub>ClN<sub>5</sub>NaO<sub>3</sub> [M + Na<sup>+</sup>] 354.0370, found 354.0356.

**9-allyl-2-chloro-6-(4-chlorophenoxy)-9H-purine (4e)**

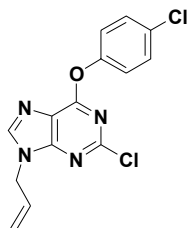

White powder, mp 101-103 °C. <sup>1</sup>H NMR (CDCl<sub>3</sub>, 400 MHz) δ 8.00 (s, 1H), 7.42-7.22 (m, 4H), 6.08-5.99 (m, 1H), 5.36 (d, J=10.4 Hz, 1H), 5.26 (d, J=17.2 Hz, 1H), 4.85 (d, J=5.6 Hz, 2H). <sup>13</sup>C NMR (CDCl<sub>3</sub>, 100 MHz) δ 159.7, 154.2, 152.9, 150.5, 143.5, 131.2, 131.0, 129.6, 122.9, 120.3, 119.9, 46.2. HRMS: calcd for C<sub>14</sub>H<sub>11</sub>Cl<sub>2</sub>N<sub>4</sub>O [M + H<sup>+</sup>] 321.0304, found 321.0300.

**9-allyl-2-chloro-6-(perchlorophenoxy)-9H-purine (4f)**

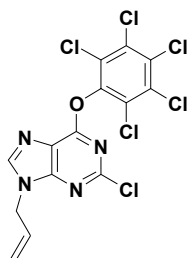

White powder, mp 209-211 °C. <sup>1</sup>H NMR (CDCl<sub>3</sub>, 400 MHz) δ 8.06 (s, 1H), 6.11-6.01 (m, 1H), 5.41 (d, J=10.4 Hz, 1H), 5.34 (d, J=17.2 Hz, 1H), 4.89 (d, J=6 Hz, 2H). <sup>13</sup>C NMR (CDCl<sub>3</sub>, 100 MHz) δ 157.6, 154.7, 152.8, 145.0, 144.1, 132.1, 131.8, 130.7, 128.0, 120.4, 119.7, 46.4. HRMS: calcd for C<sub>14</sub>H<sub>6</sub>Cl<sub>6</sub>N<sub>4</sub>NaO [M + Na<sup>+</sup>] 478.8565, found 478.8559.

**9-allyl-2-chloro-6-(naphthalen-2-yloxy)-9H-purine (4g)**

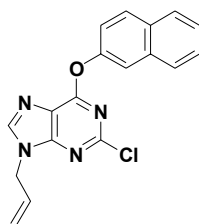



White powder, mp 143-144 °C.  $^1\text{H}$  NMR ( $\text{CDCl}_3$ , 400 MHz)  $\delta$  8.01 (s, 1H), 7.93-7.83 (m, 3H), 7.75 (d,  $J=2$  Hz, 1H), 7.52-7.41 (m, 3H), 6.11-6.01 (m, 1H), 5.38 (d,  $J=10.4$  Hz, 1H), 5.29 (d,  $J=17.2$  Hz, 1H), 4.87 (d,  $J=5.6$  Hz, 2H).  $^{13}\text{C}$  NMR ( $\text{CDCl}_3$ , 100 MHz)  $\delta$  160.2, 154.1, 153.0, 149.8, 143.4, 133.9, 131.5, 131.1, 129.5, 127.8, 127.7, 126.6, 125.8, 121.2, 120.5, 119.8, 118.4, 46.2. HRMS: calcd for  $\text{C}_{18}\text{H}_{14}\text{ClN}_4\text{O}$  [ $\text{M} + \text{H}^+$ ] 337.0851, found 337.0838.

#### 9-allyl-2-chloro-6-(naphthalen-1-yloxy)-9H-purine (4h)

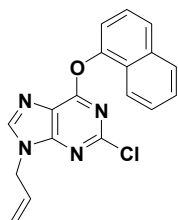

Light yellow powder, mp 116-117 °C.  $^1\text{H}$  NMR ( $\text{CDCl}_3$ , 400 MHz)  $\delta$  8.02 (s, 1H), 7.97 (d,  $J=8.4$  Hz, 1H), 7.91 (d,  $J=8$  Hz, 1H), 7.81 (d,  $J=8$  Hz, 1H), 7.55-7.41 (m, 4H), 6.10-6.00 (m, 1H), 5.37 (d,  $J=10.4$  Hz, 1H), 5.29 (d,  $J=17.2$  Hz, 1H), 4.86 (d,  $J=6$  Hz, 2H).  $^{13}\text{C}$  NMR ( $\text{CDCl}_3$ , 100 MHz)  $\delta$  160.7, 154.3, 153.2, 148.1, 143.4, 134.8, 131.1, 128.0, 126.9, 126.5, 126.4, 126.1, 125.5, 121.5, 120.4, 119.9, 118.0, 46.2. HRMS: calcd for  $\text{C}_{18}\text{H}_{14}\text{ClN}_4\text{O}$  [ $\text{M} + \text{H}^+$ ] 337.0851, found 337.0843.

#### 9-allyl-2-chloro-6-(phenylthio)-9H-purine (4j)

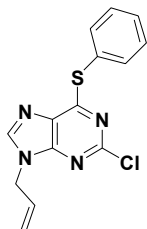

White powder, mp 89-91 °C.  $^1\text{H}$  NMR ( $\text{CDCl}_3$ , 400 MHz)  $\delta$  7.95 (s, 1H), 7.66-7.45 (m, 5H), 6.06-5.96 (m, 1H), 5.35 (d,  $J=10.4$  Hz, 1H), 5.24 (d,  $J=16.8$  Hz, 1H), 4.81 (d,  $J=5.6$  Hz, 2H).  $^{13}\text{C}$  NMR ( $\text{CDCl}_3$ , 100 MHz)  $\delta$  162.7, 153.8, 150.3, 143.3, 135.3, 131.0, 129.7, 129.2, 126.5, 119.9, 46.0. HRMS: calcd for  $\text{C}_{14}\text{H}_{11}\text{ClN}_4\text{NaS}$  [ $\text{M} + \text{Na}^+$ ] 325.0285, found 325.0284.

**9-allyl-2-chloro-N-phenyl-9H-purin-6-amine (4k)**

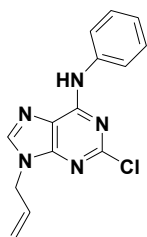

Light yellow powder, mp 144-145 °C.  $^1\text{H}$  NMR ( $\text{CDCl}_3$ , 400 MHz)  $\delta$  8.03 (s, 1H), 7.76 (d,  $J=7.6$  Hz, 3H), 7.38 (t,  $J=8$  Hz, 2H), 7.13 (t,  $J=7.2$  Hz, 1H), 6.06-5.97 (m, 1H), 5.33 (d,  $J=10$  Hz, 1H), 5.23 (d,  $J=17.2$  Hz, 1H), 4.79 (d,  $J=6$  Hz, 2H).  $^{13}\text{C}$  NMR ( $\text{CDCl}_3$ , 100 MHz)  $\delta$  154.2, 152.3, 150.5, 140.7, 138.0, 131.4, 129.1, 124.0, 120.2, 119.5, 119.0, 45.9. HRMS: calcd for  $\text{C}_{14}\text{H}_{13}\text{ClN}_5$  [ $\text{M} + \text{H}^+$ ] 286.0854, found 286.0850.

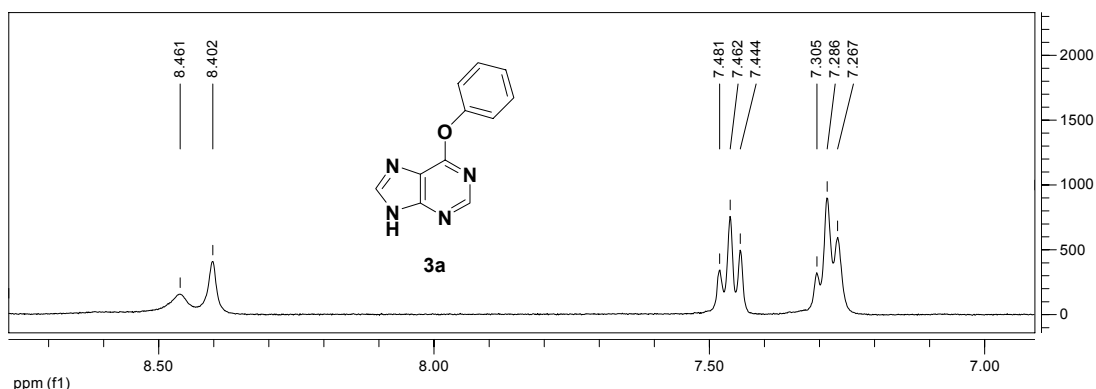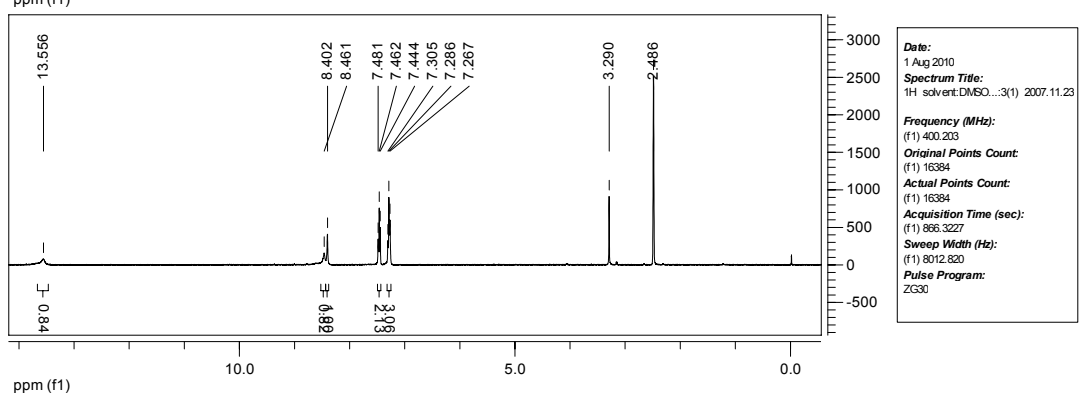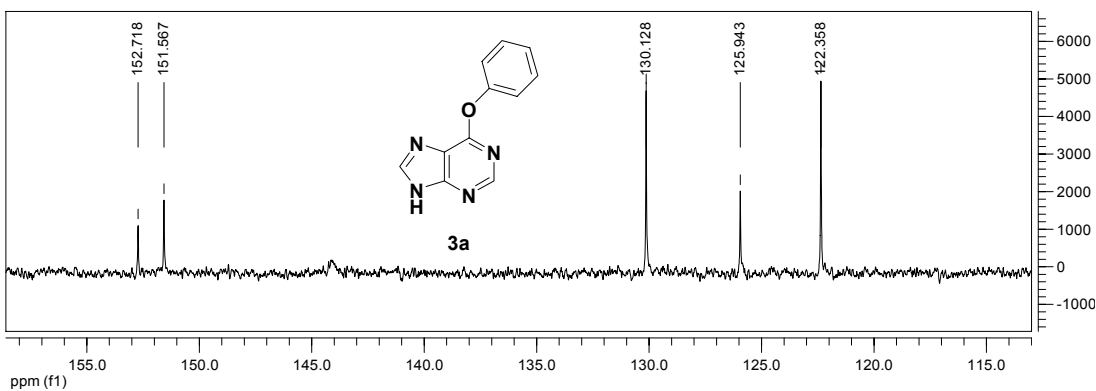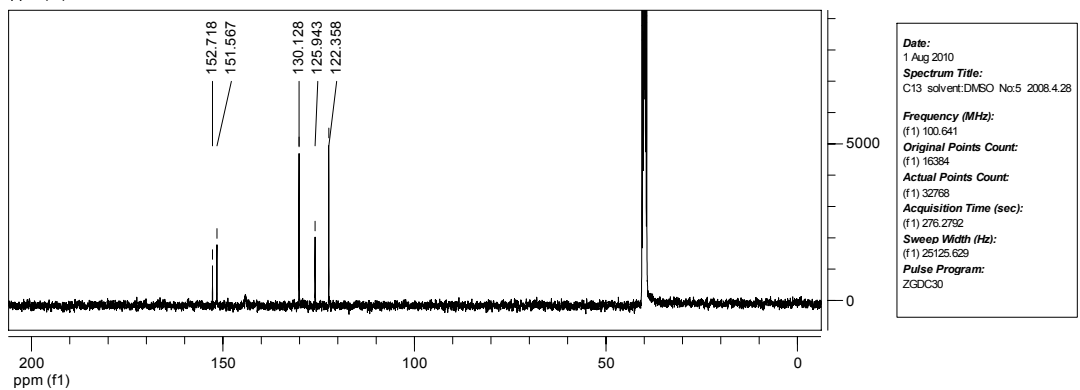

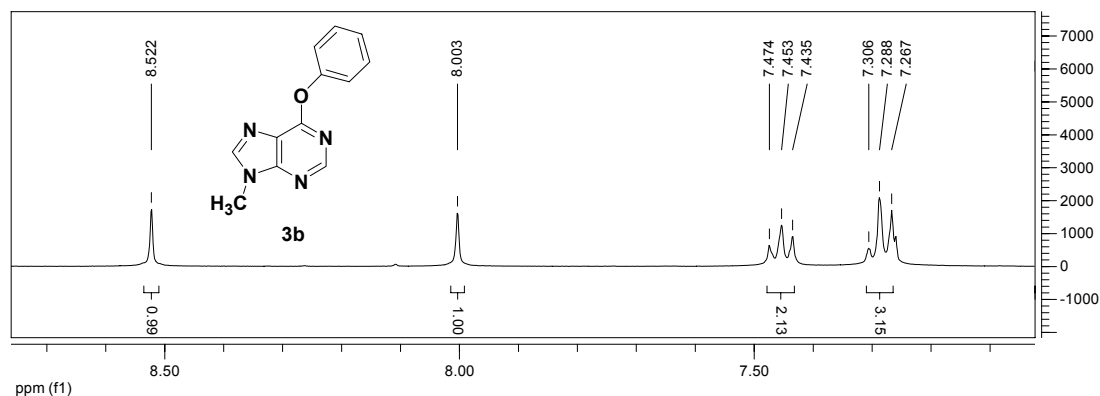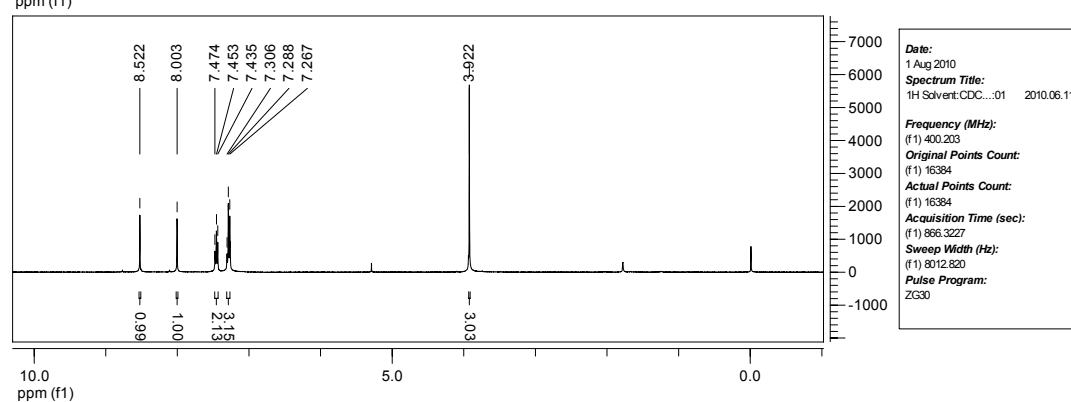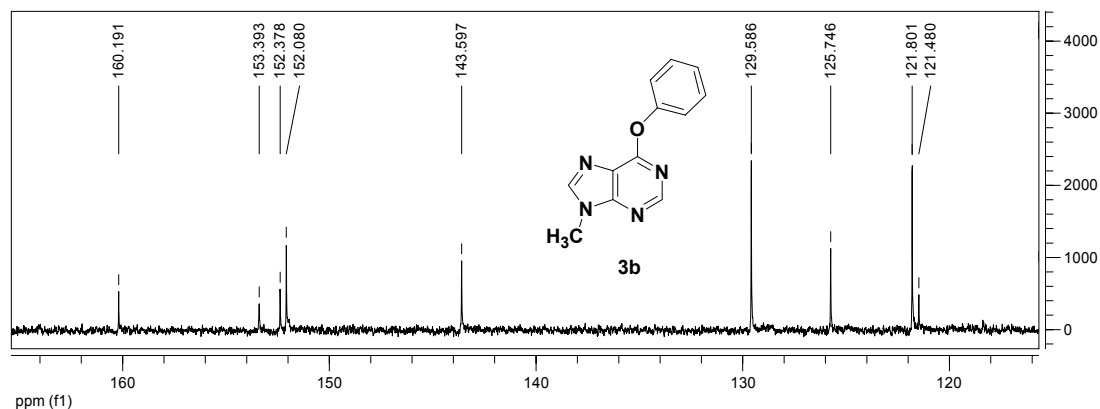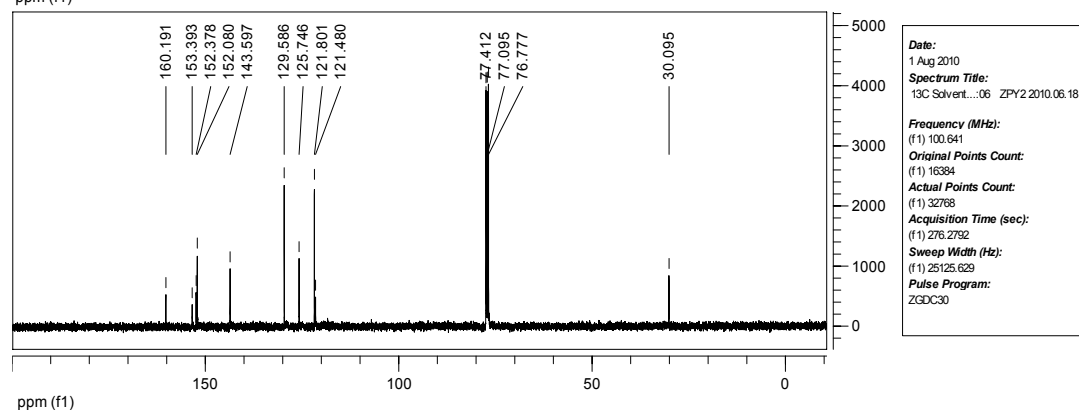



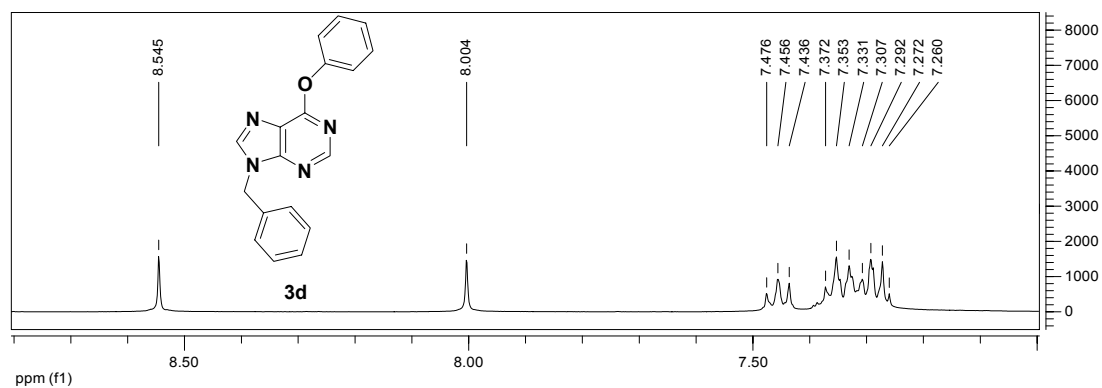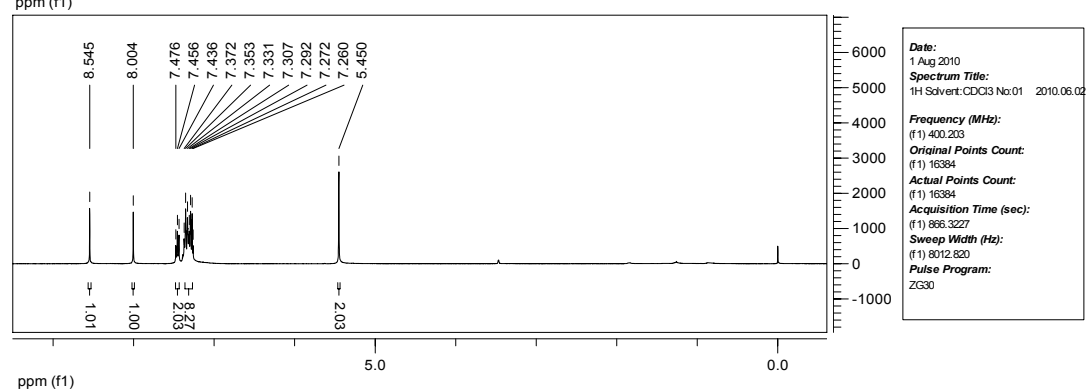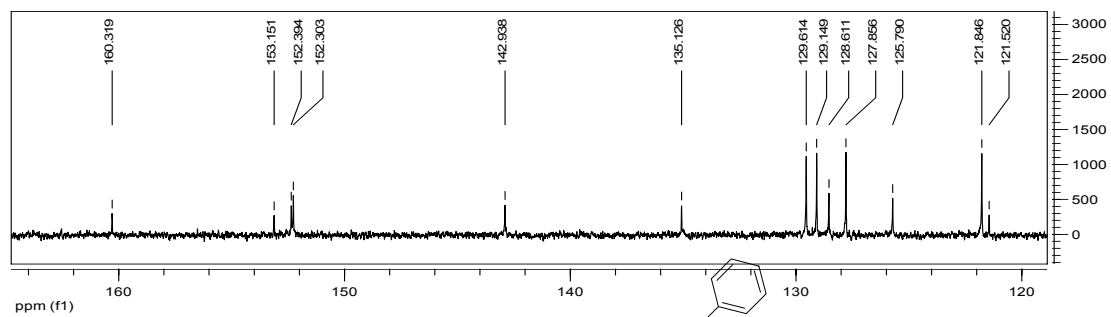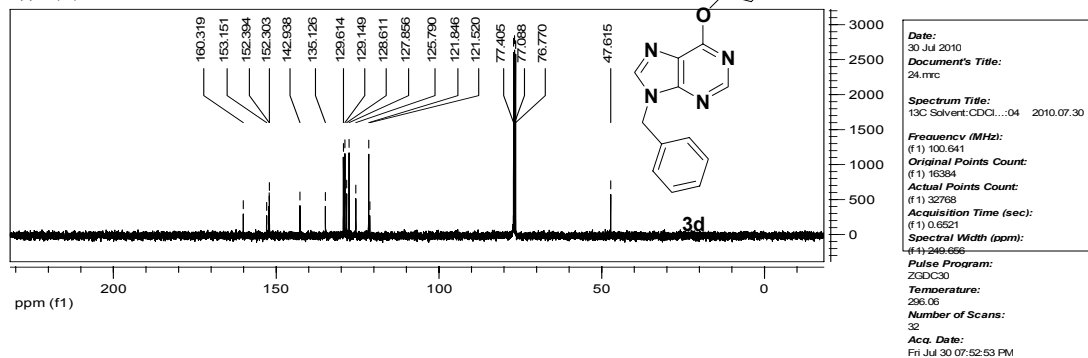

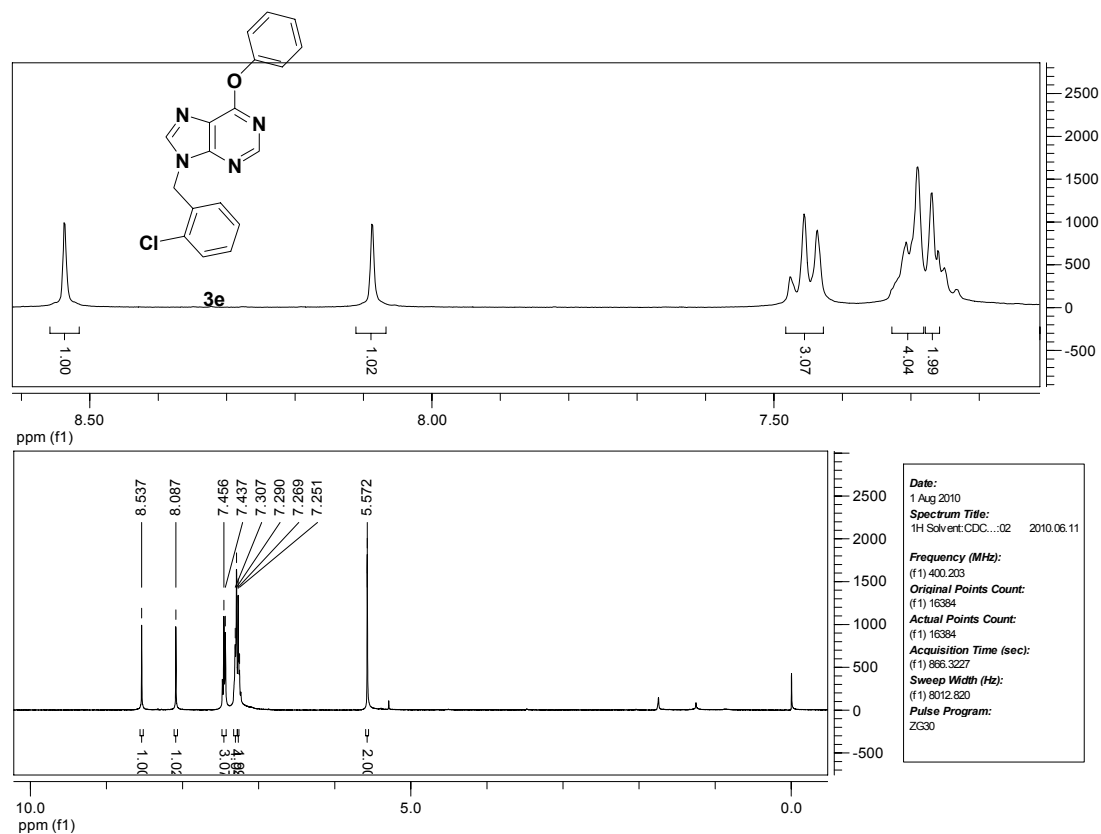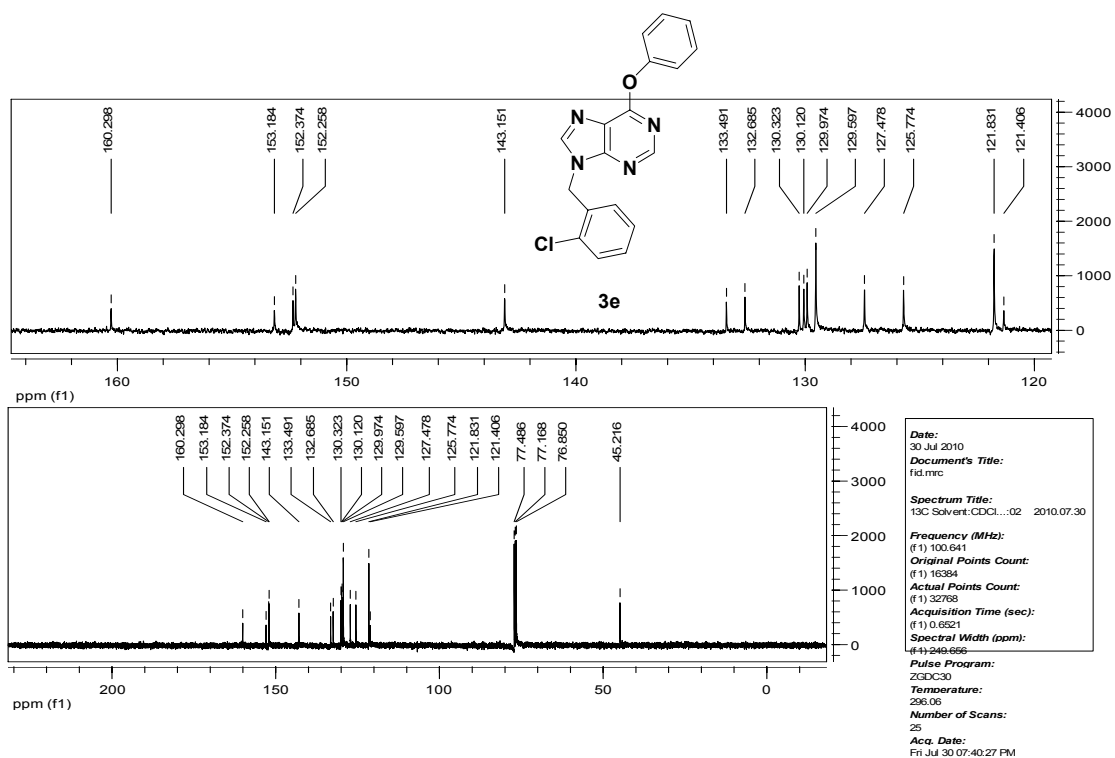





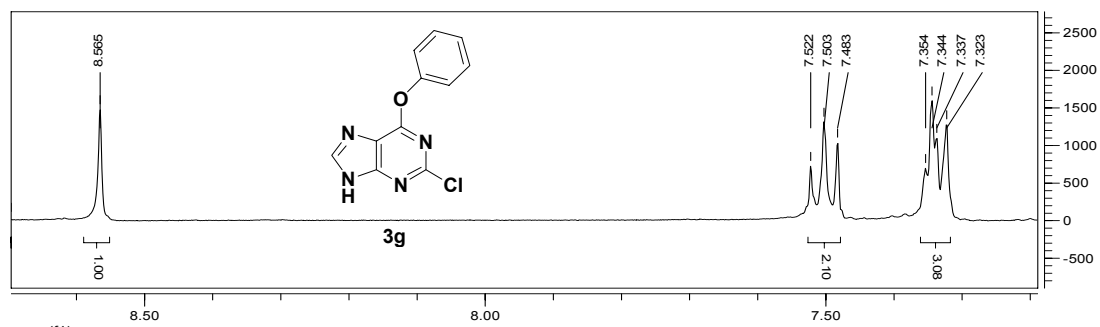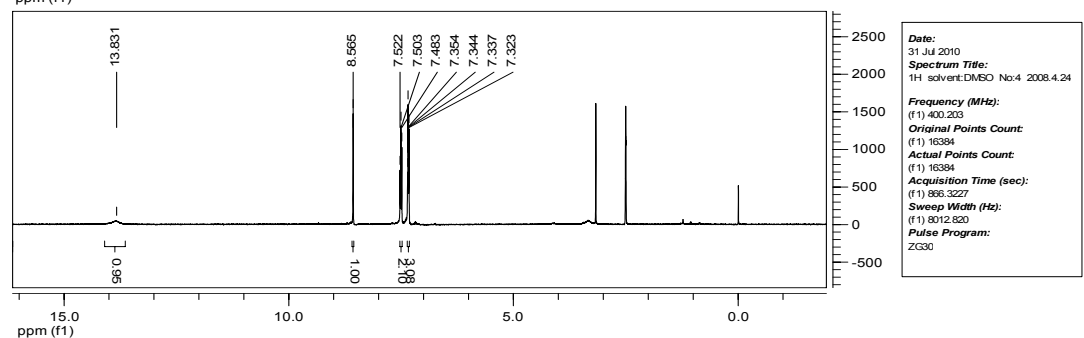

Date: 31 Jul 2010  
Spectrum Title: 1H solvent:DMSO No:4 2008.4.24  
Frequency (MHz): (f1) 400.203  
Original Points Count: (f1) 16384  
Actual Points Count: (f1) 16384  
Acquisition Time (sec): (f1) 866.3227  
Sweep Width (Hz): (f1) 8012.830  
Pulse Program: ZC30

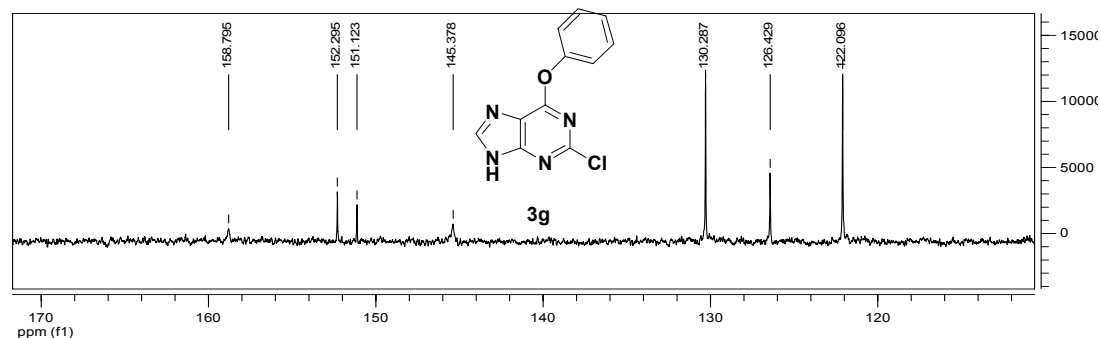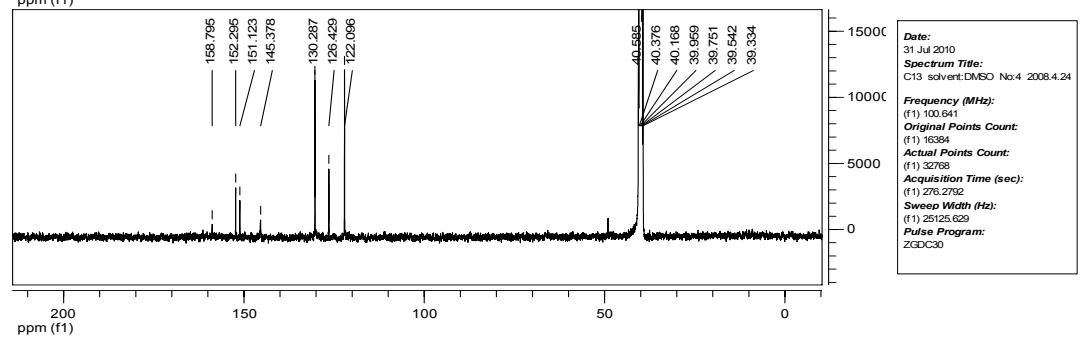

Date: 31 Jul 2010  
Spectrum Title: C13 solvent:DMSO No:4 2008.4.24  
Frequency (MHz): (f1) 100.641  
Original Points Count: (f1) 16384  
Actual Points Count: (f1) 32768  
Acquisition Time (sec): (f1) 276.2792  
Sweep Width (Hz): (f1) 25125.629  
Pulse Program: ZGDC30

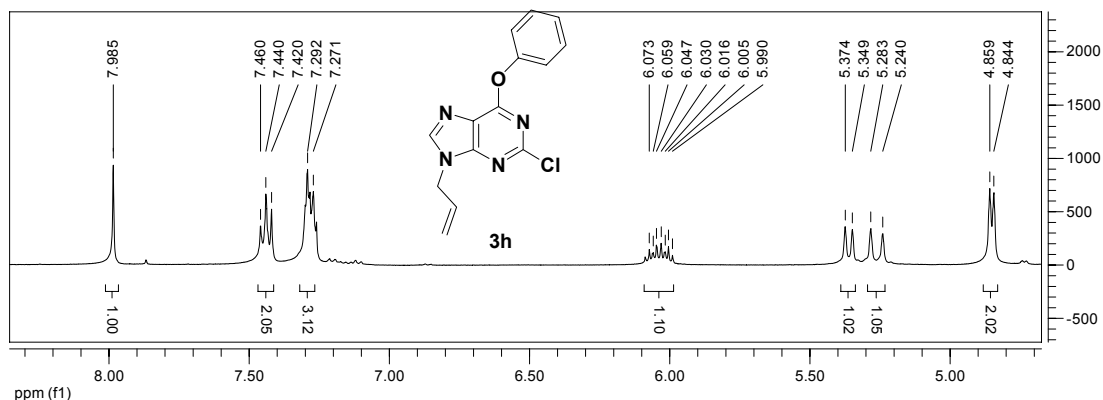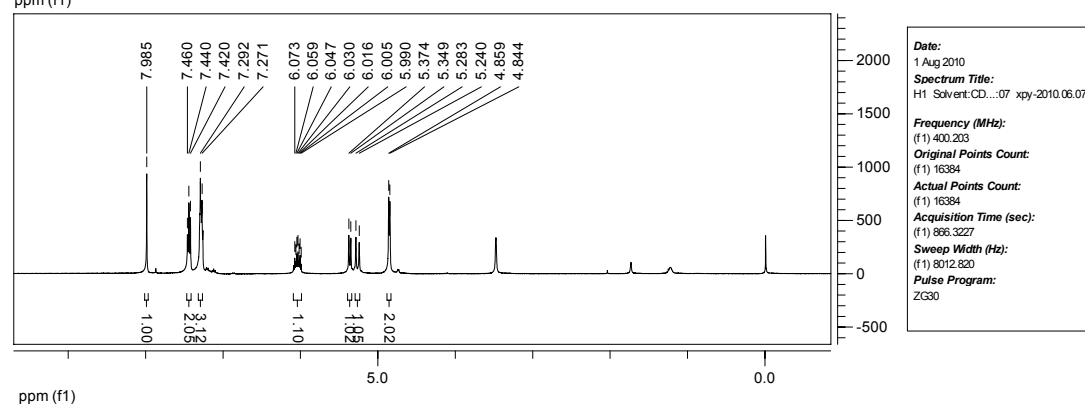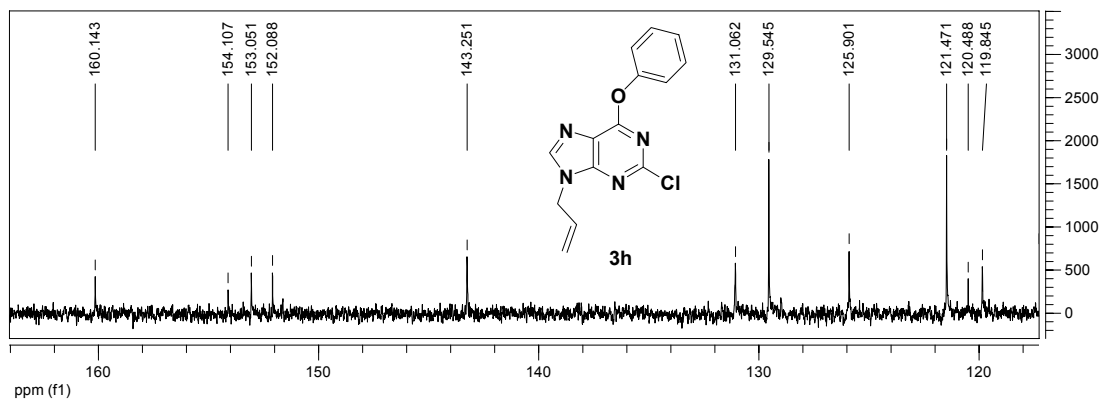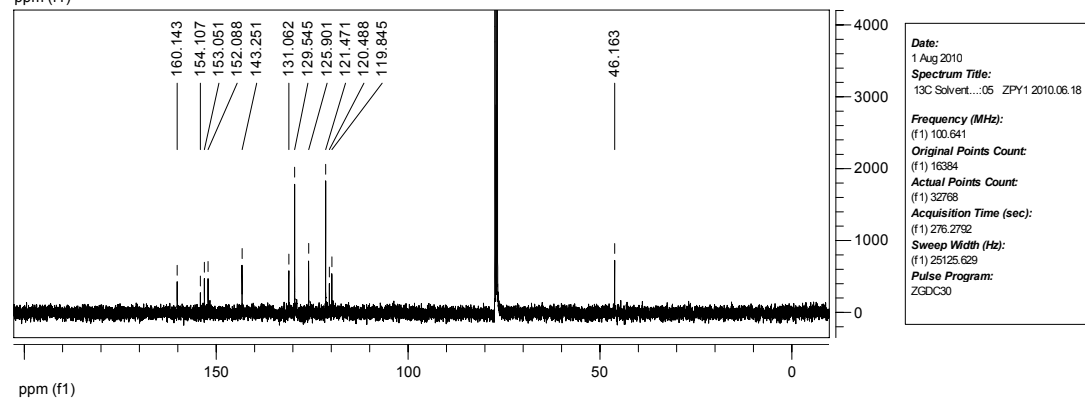

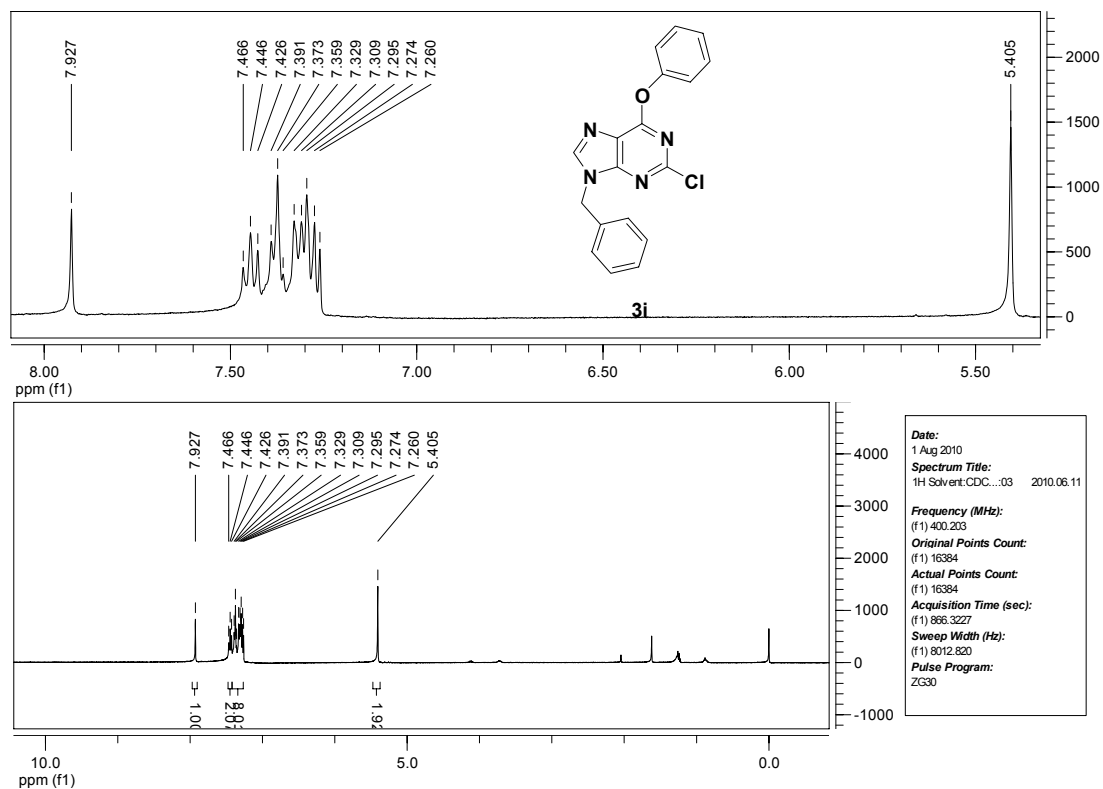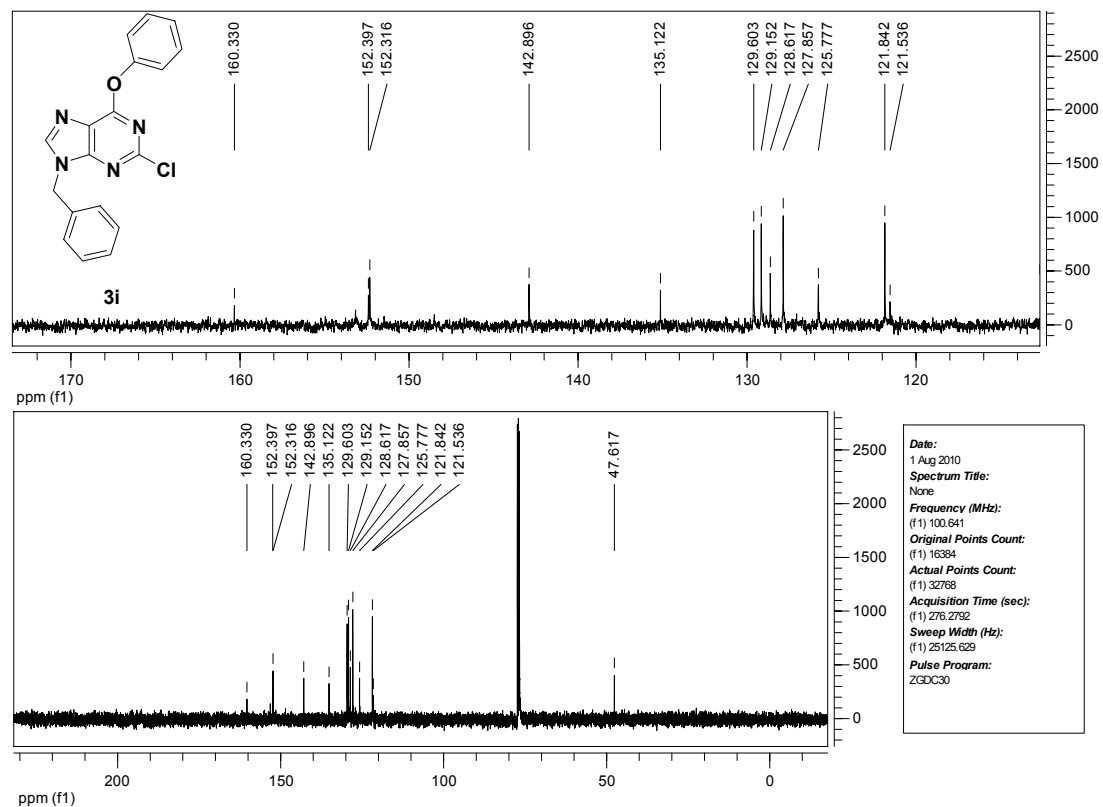

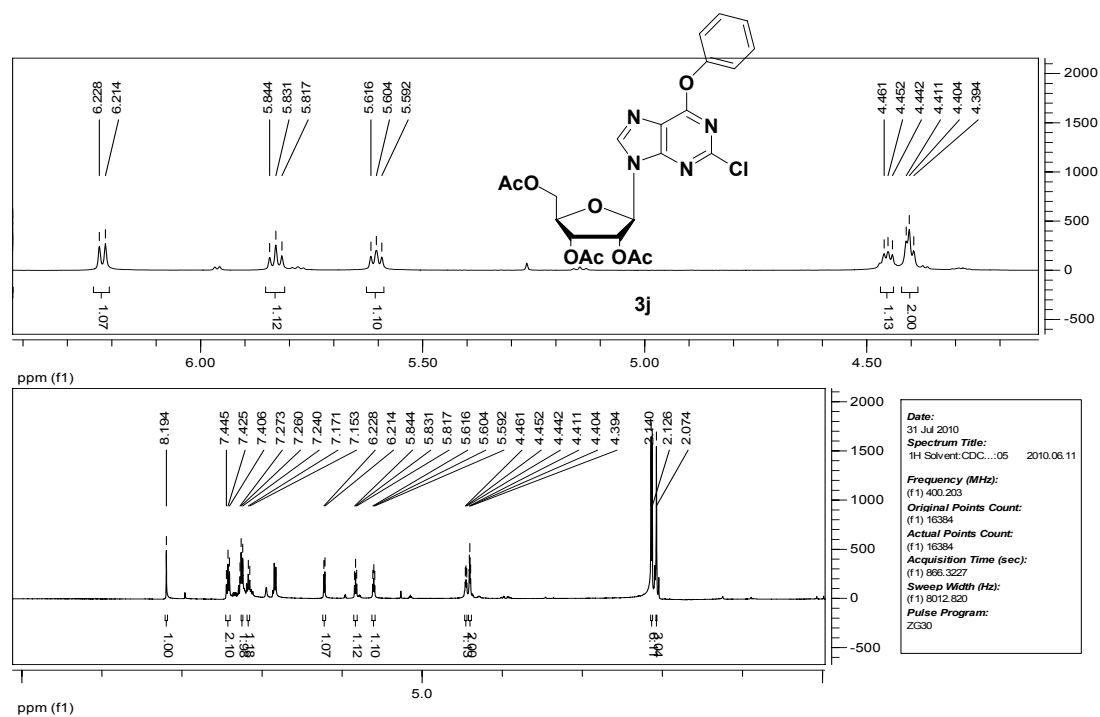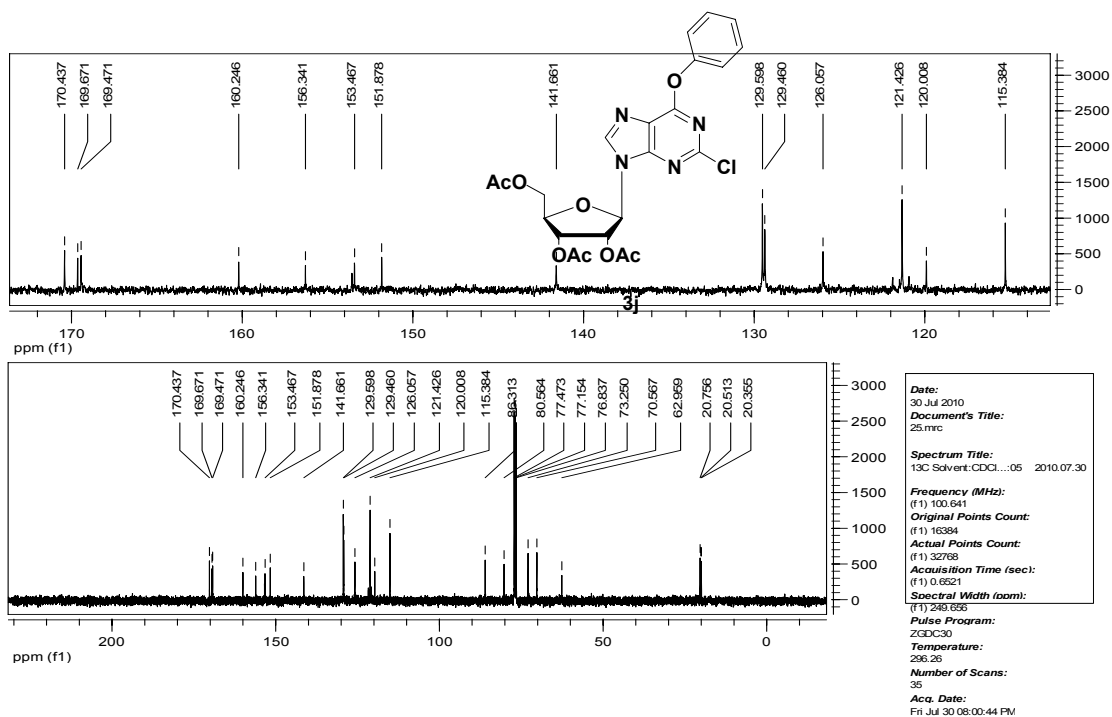



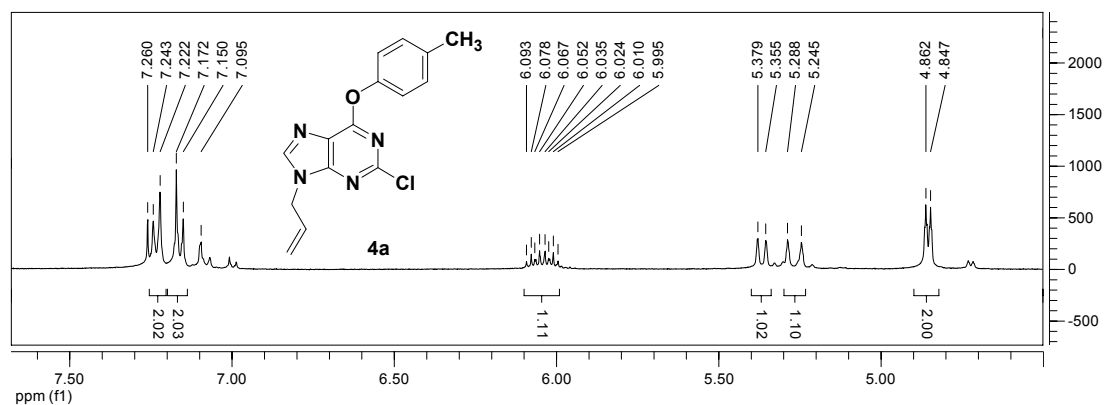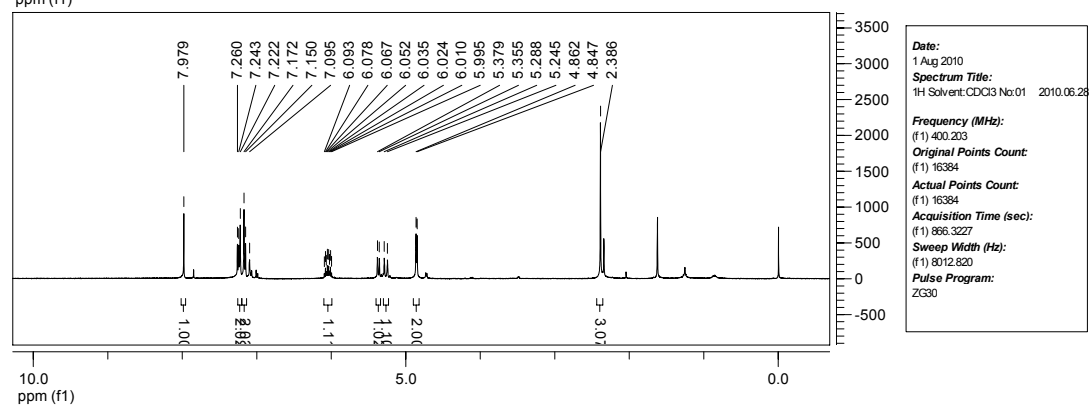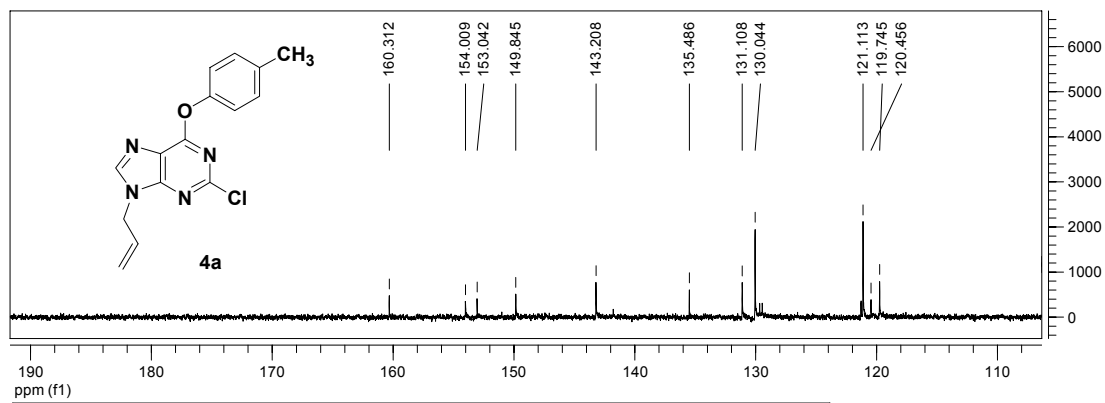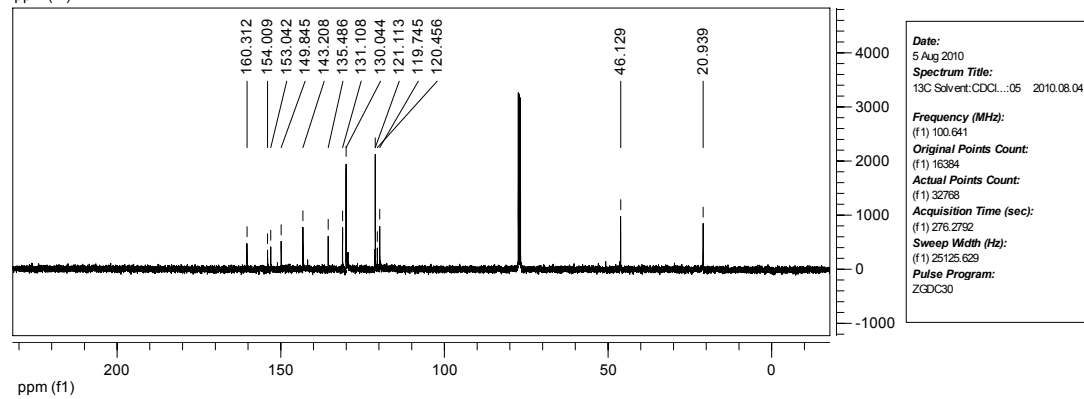

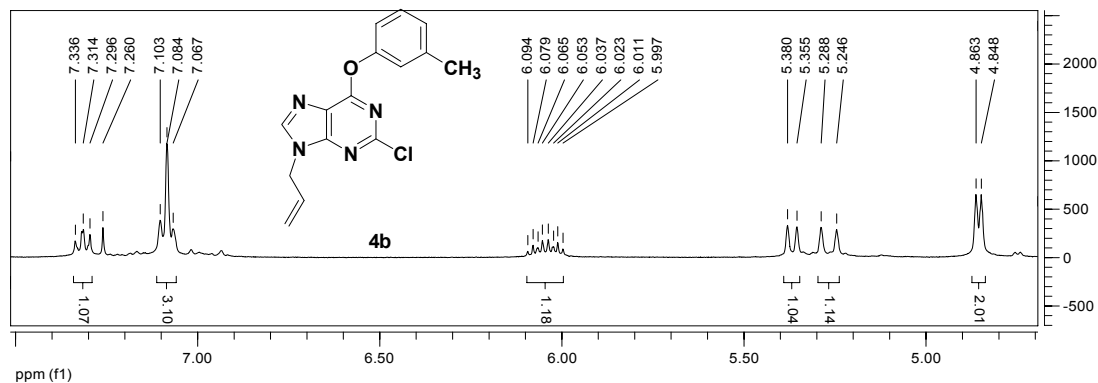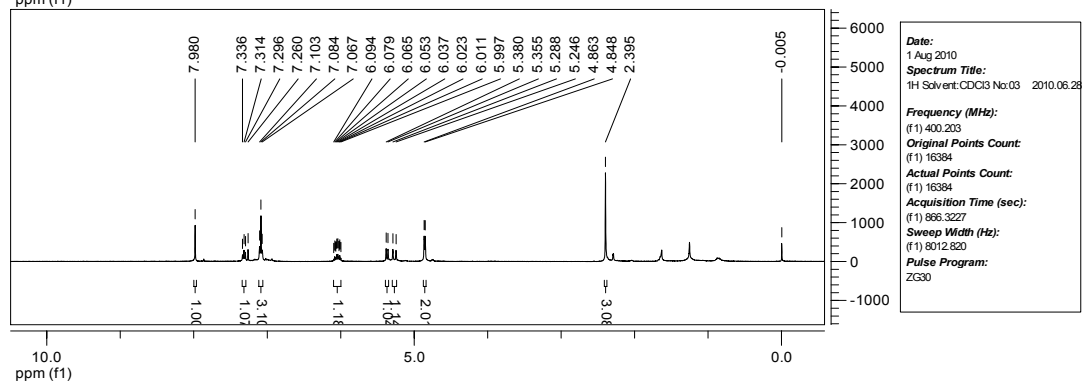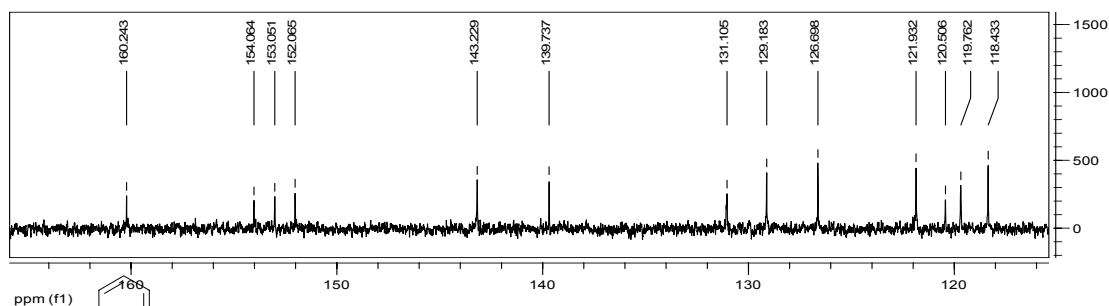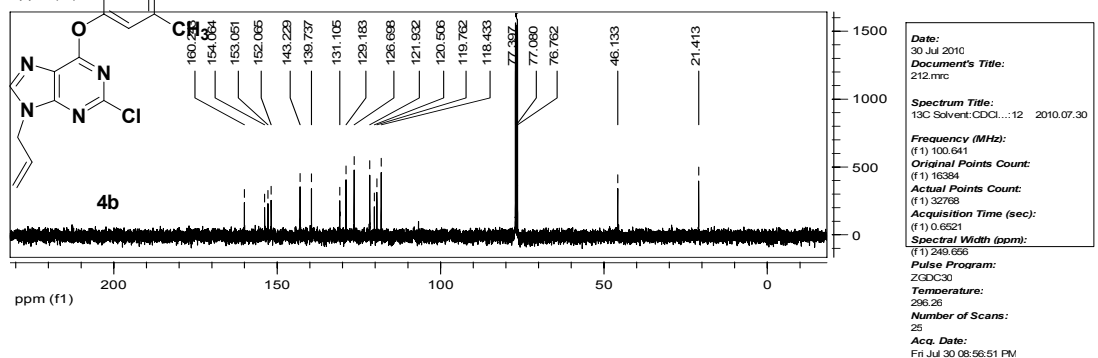

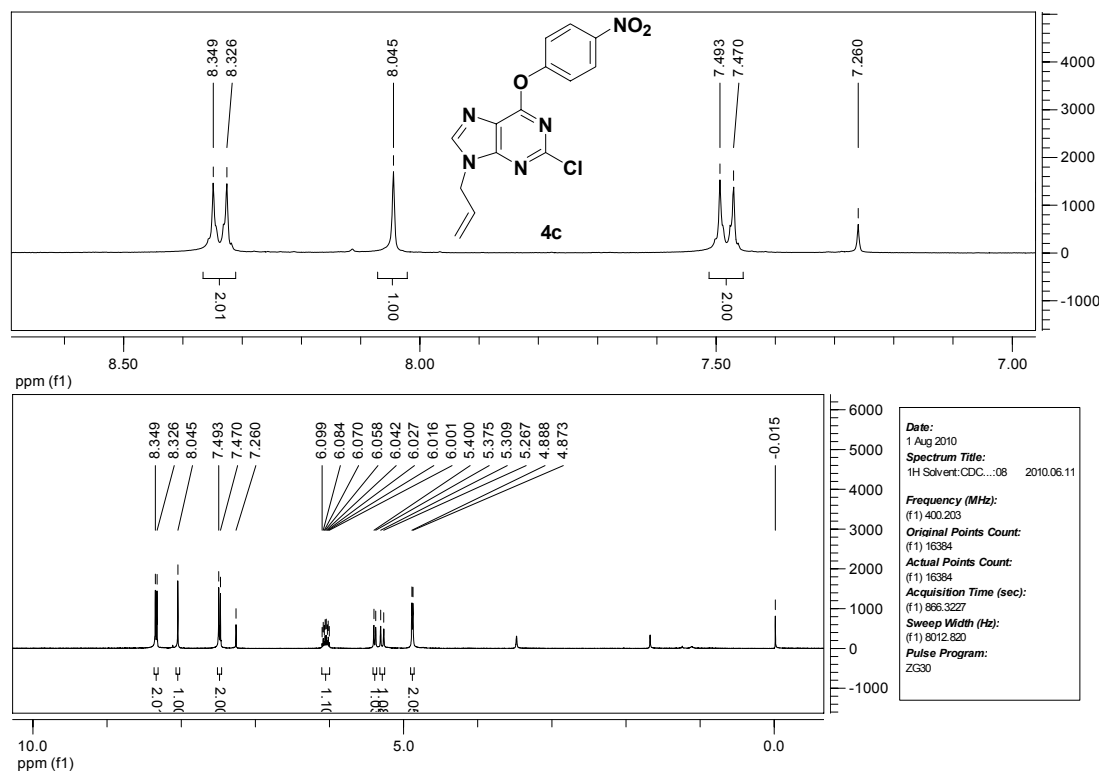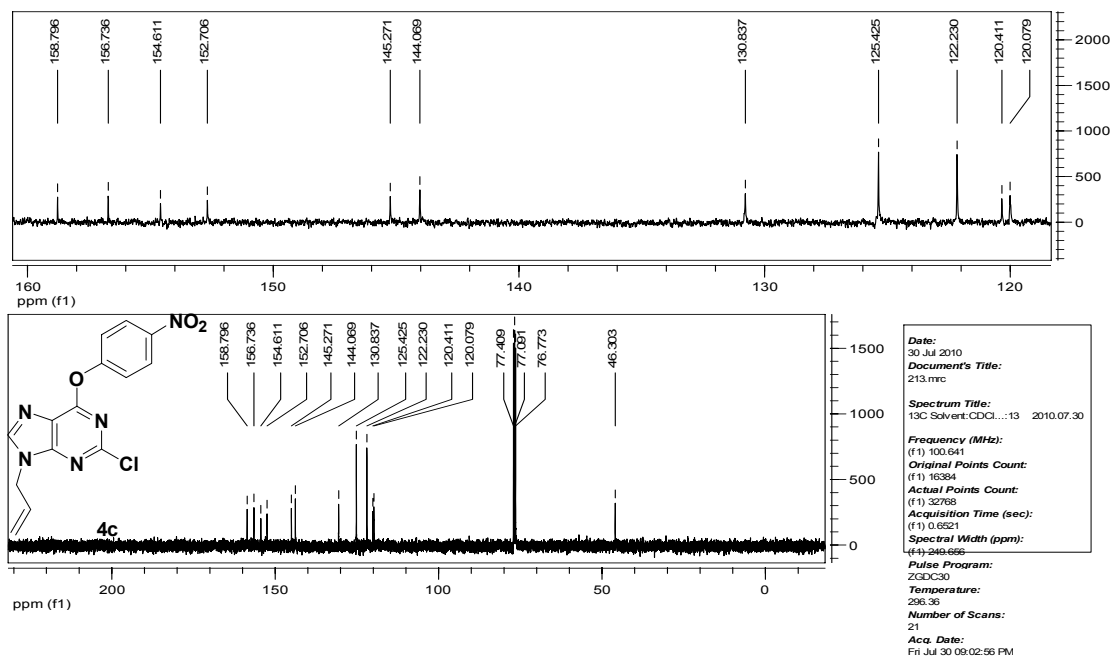



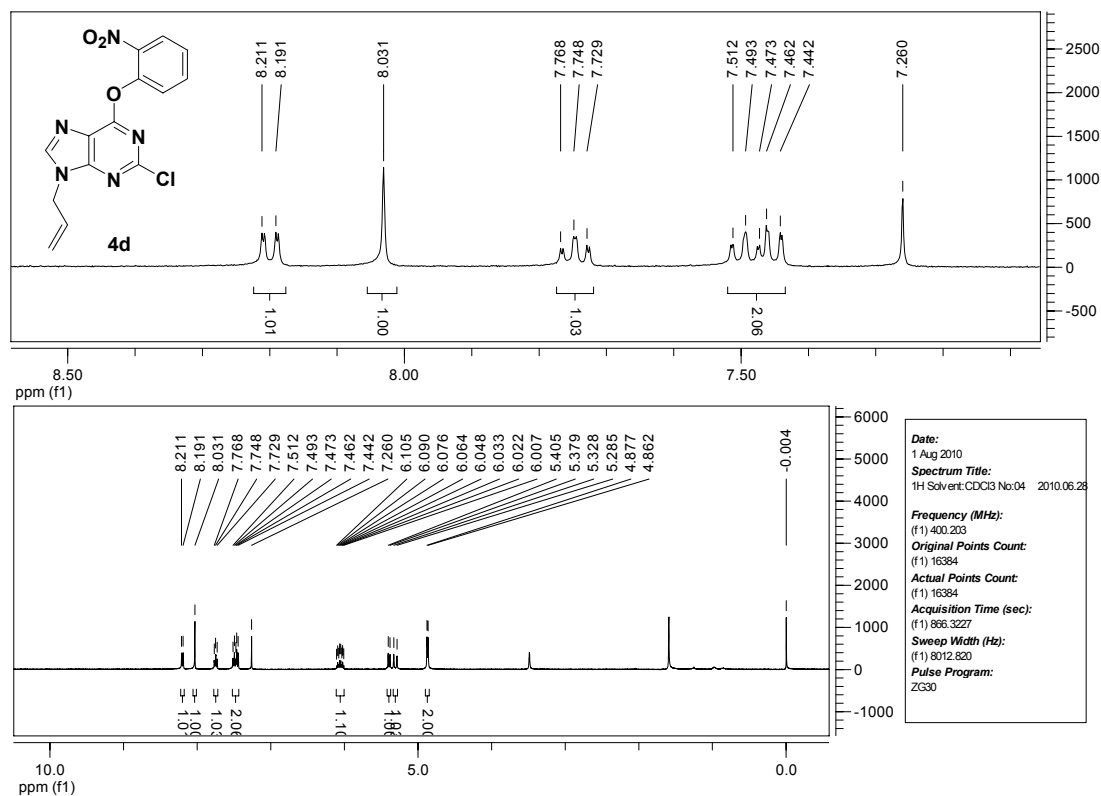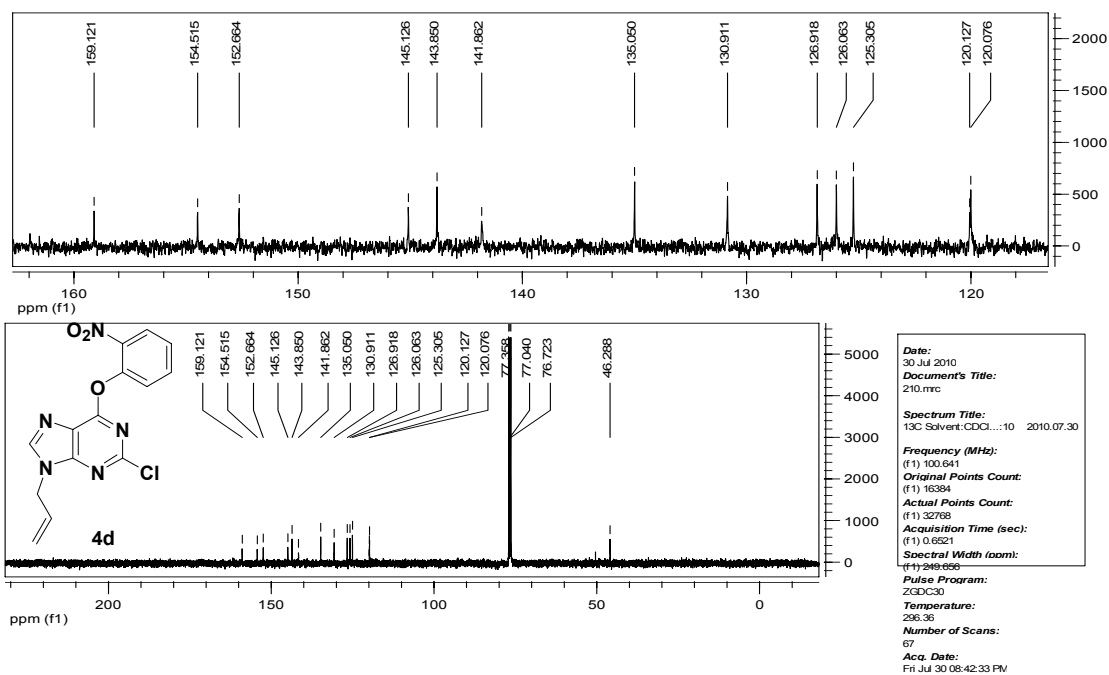

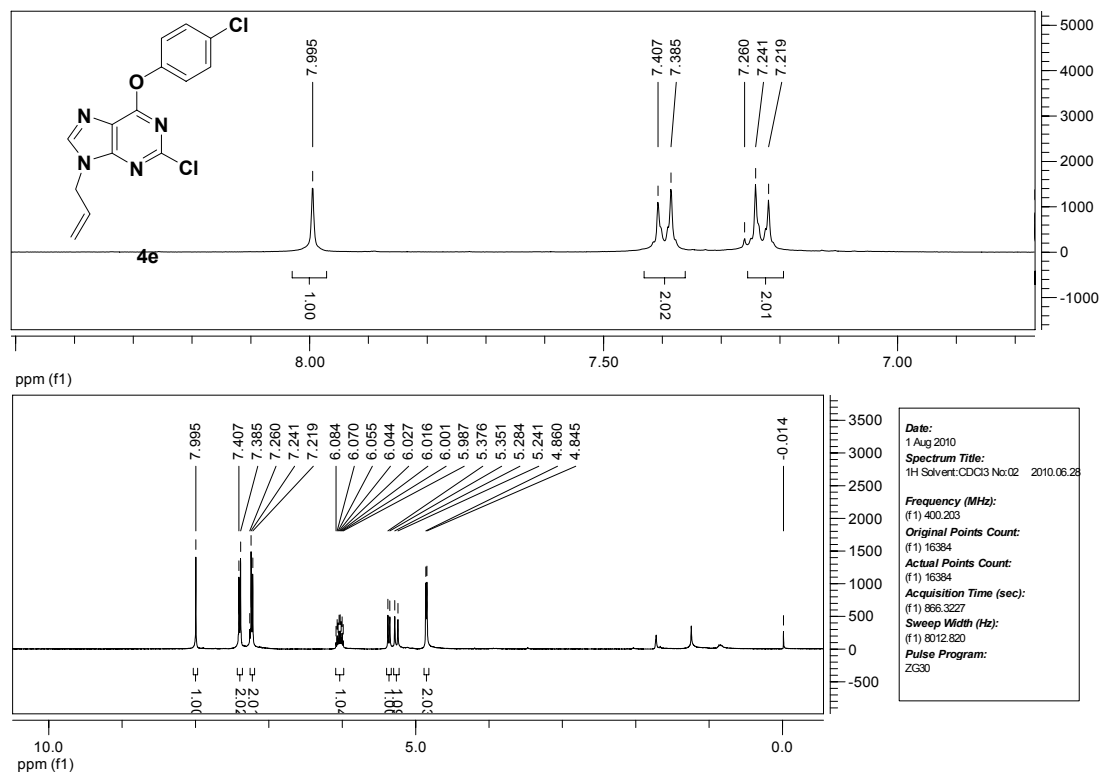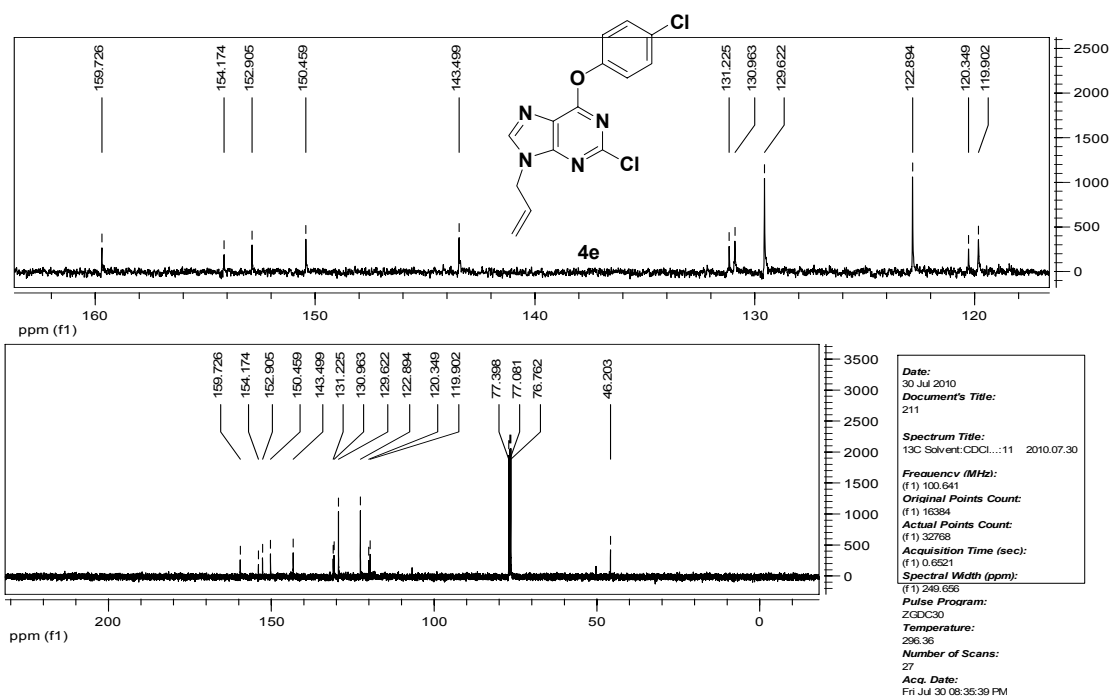



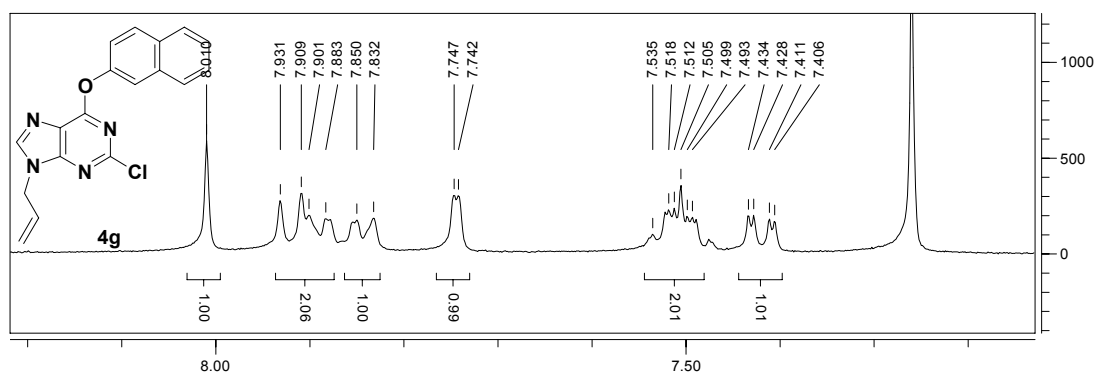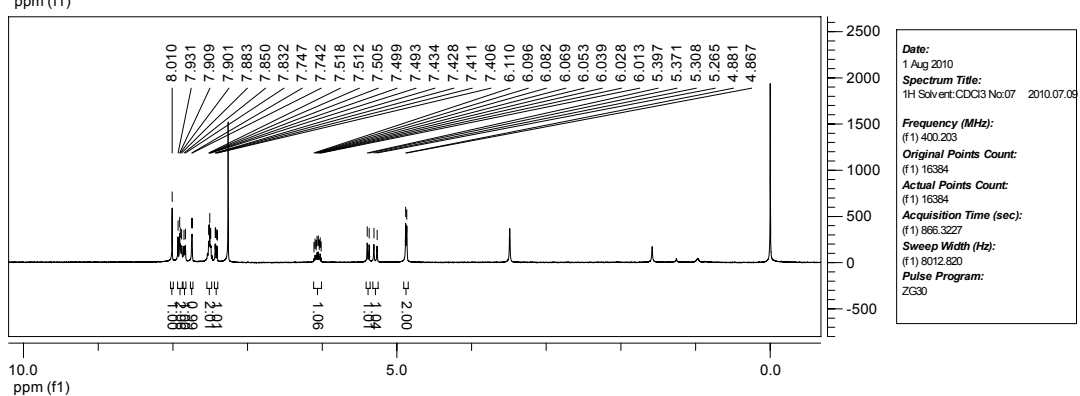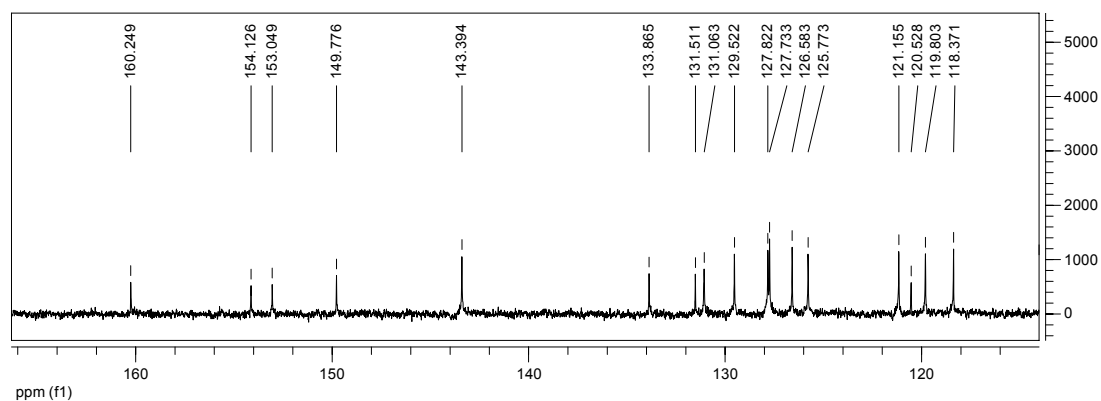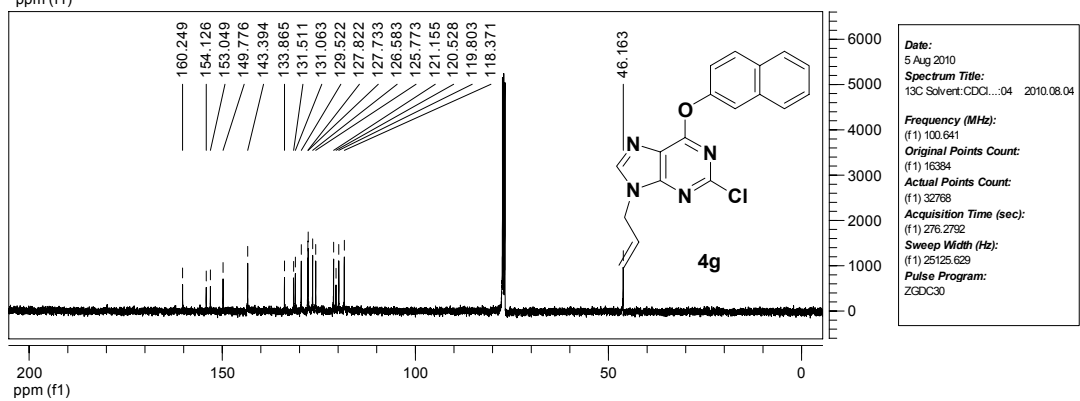

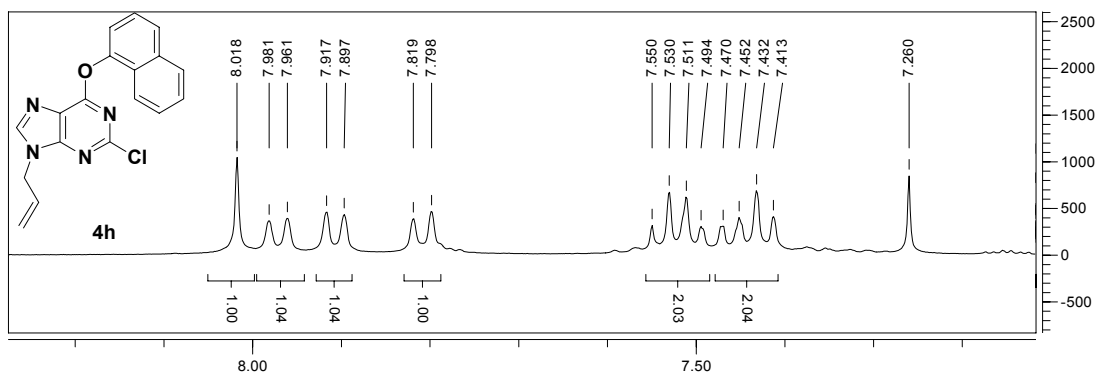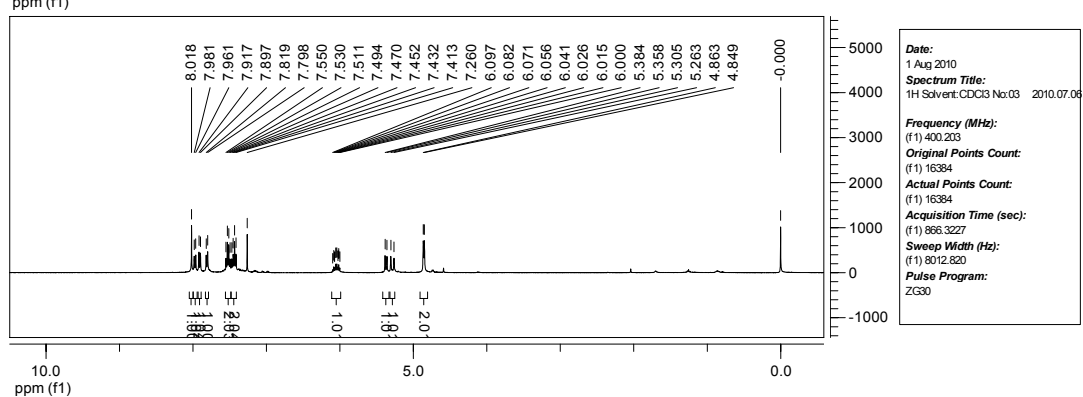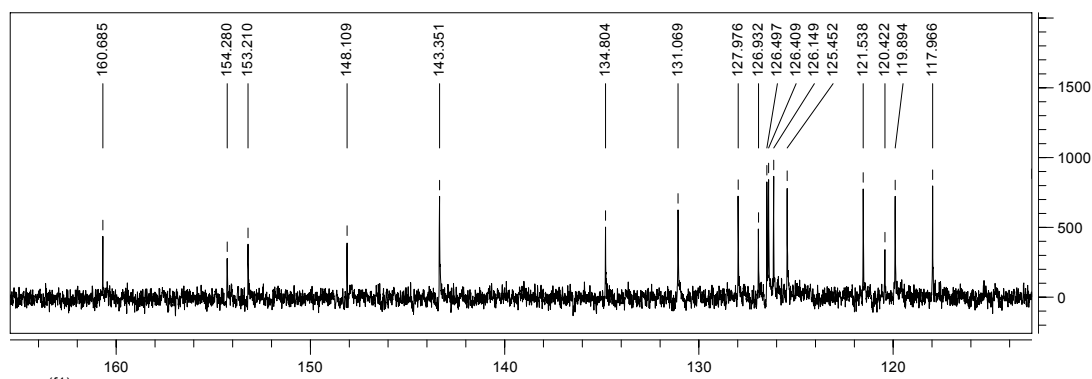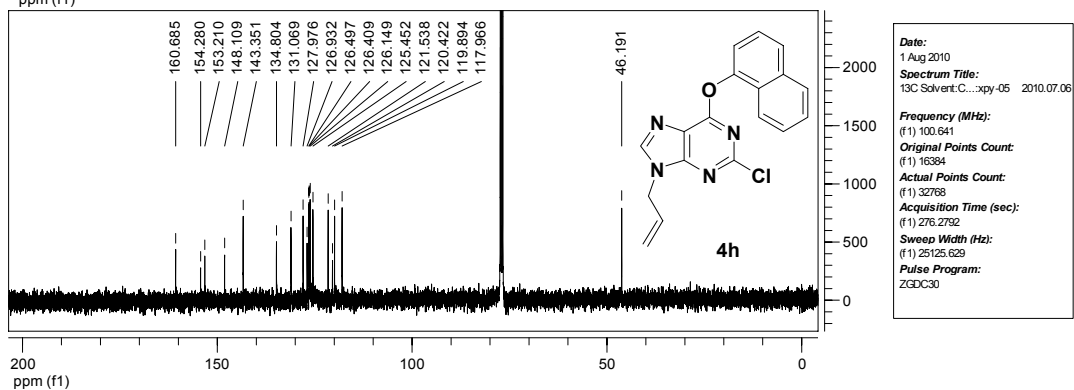

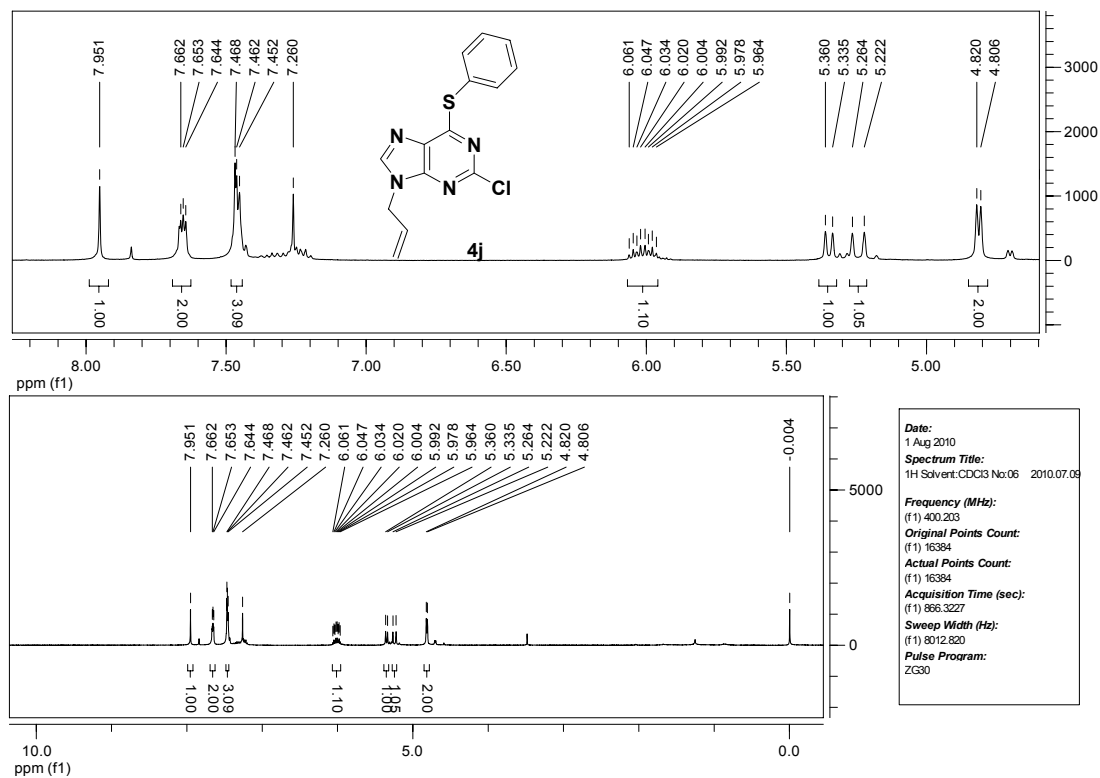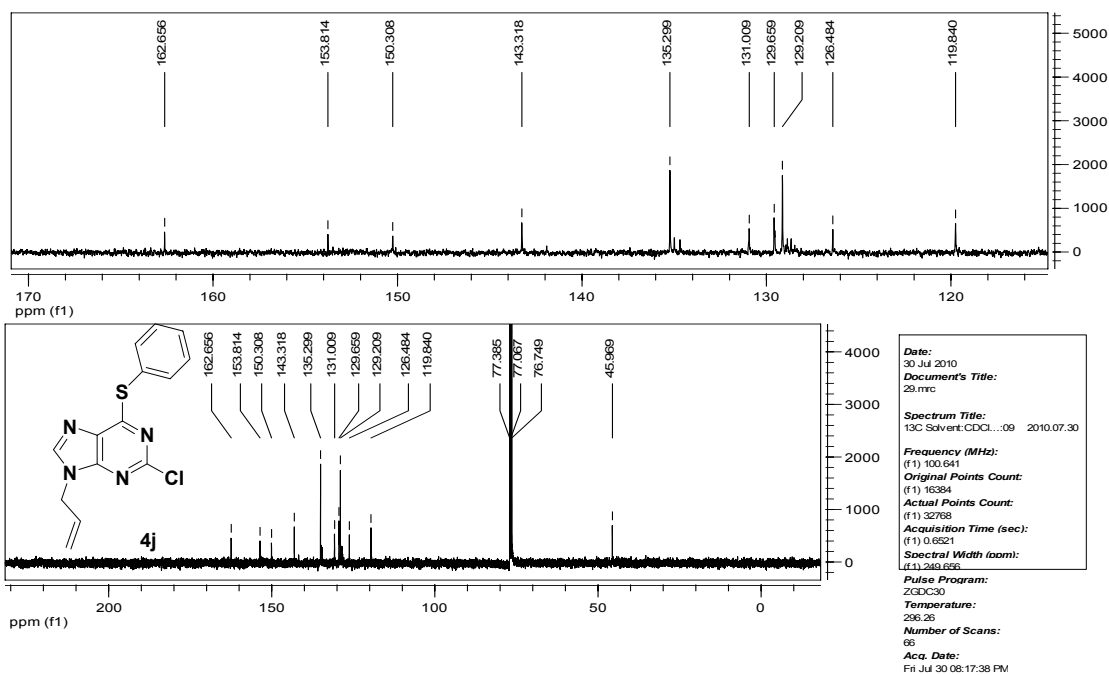

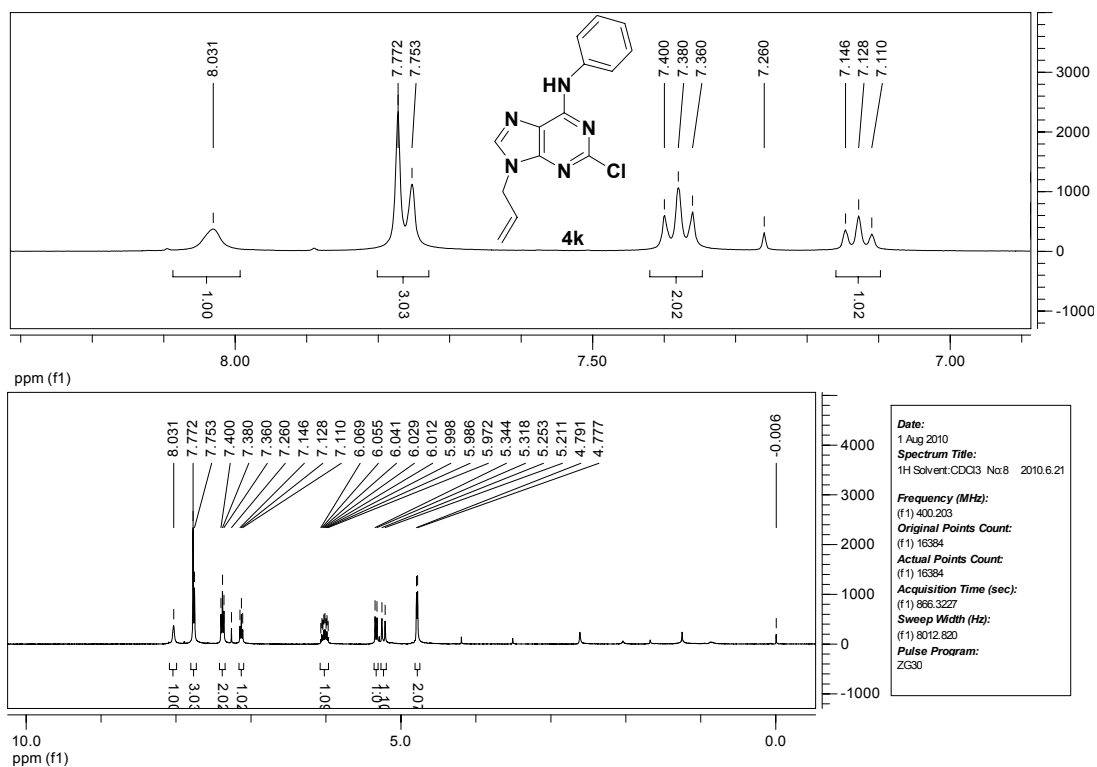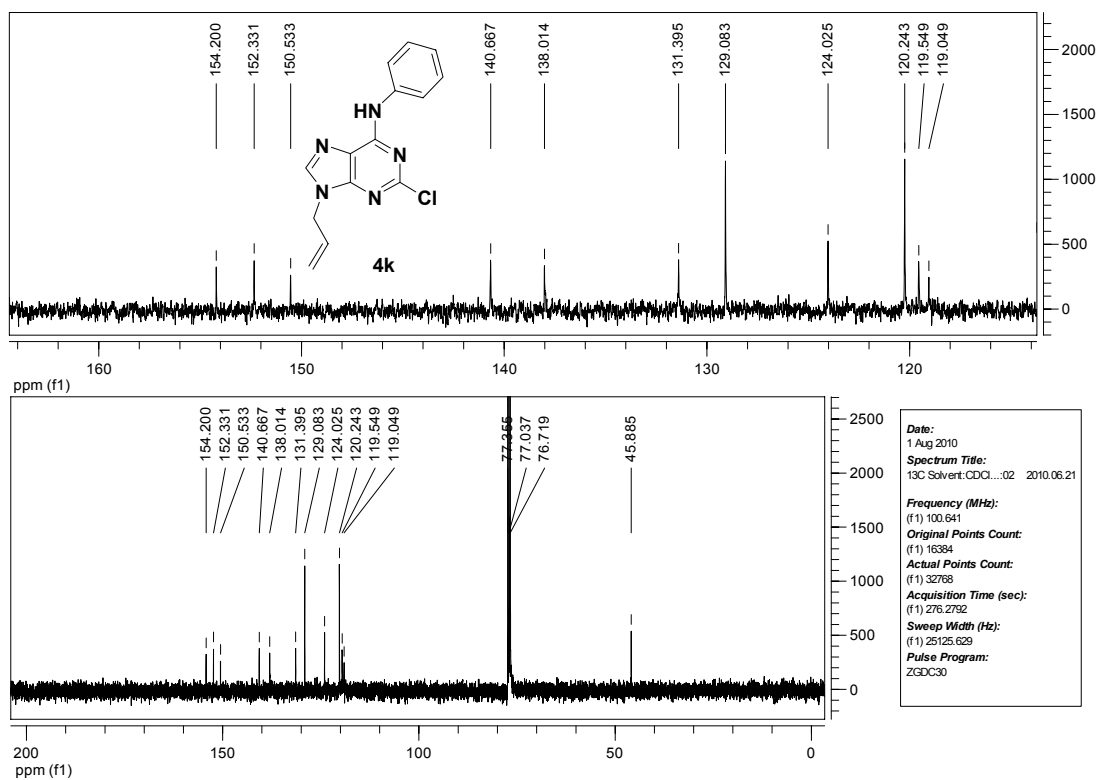

Supplement: c0gc00517g.pdf [file c0gc00517g.pdf]
